# Supplementary material for: Impact of patient gender on low back pain management before and after the COVID-19 pandemic in commercially insured and Medicare Advantage cohorts. A retrospective cohort study
Source: medRxiv preprint, doi:10.1101/2023.06.05.23290968, version 1 (2023-06-05)
Supplement: Supplement - State [file 290968_file15.pdf]

| Supplement State- Episode distribution by individual home address 5-digit zip code State and insurance coverage |               |        |        |                         |       |       |       |        |       |                           |       |       |       |       |       |               |        |        |                         |        |        |        |        |        |                           |        |        |        |       |       |
|-----------------------------------------------------------------------------------------------------------------|---------------|--------|--------|-------------------------|-------|-------|-------|--------|-------|---------------------------|-------|-------|-------|-------|-------|---------------|--------|--------|-------------------------|--------|--------|--------|--------|--------|---------------------------|--------|--------|--------|-------|-------|
|                                                                                                                 | Episode Count |        |        |                         |       |       |       |        |       |                           |       |       |       |       |       | % of Episodes |        |        |                         |        |        |        |        |        |                           |        |        |        |       |       |
|                                                                                                                 | Total         |        |        | Medicare Advantage (MA) |       |       |       |        |       | Commercial Insurance (CI) |       |       |       |       |       | Total         |        |        | Medicare Advantage (MA) |        |        |        |        |        | Commercial Insurance (CI) |        |        |        |       |       |
|                                                                                                                 |               |        |        | Pre                     |       | Early |       | Late   |       | Pre                       |       | Early |       | Late  |       |               |        |        | Pre                     |        | Early  |        | Late   |        | Pre                       |        | Early  |        | Late  |       |
|                                                                                                                 | Total         | MA     | CI     | F                       | M     | F     | M     | F      | M     | F                         | M     | F     | M     | F     | M     | Total         | MA     | CI     | F                       | M      | F      | M      | F      | M      | F                         | M      | F      | M      |       |       |
| Total                                                                                                           | 688168        | 466125 | 222043 | 85801                   | 55457 | 91648 | 60758 | 104148 | 68313 | 34739                     | 32419 | 39913 | 38137 | 39670 | 37165 | 100.0%        | 100.0% | 100.0% | 100.0%                  | 100.0% | 100.0% | 100.0% | 100.0% | 100.0% | 100.0%                    | 100.0% | 100.0% | 100.0% |       |       |
| FL                                                                                                              | 70055         | 50911  | 19144  | 9581                    | 6671  | 9767  | 6952  | 10652  | 7288  | 3008                      | 2785  | 3503  | 3313  | 3418  | 3117  | 10.2%         | 10.9%  | 8.6%   | 11.2%                   | 12.0%  | 10.7%  | 11.4%  | 10.2%  | 10.7%  | 8.7%                      | 8.6%   | 8.8%   | 8.7%   | 8.6%  | 8.4%  |
| TX                                                                                                              | 66761         | 42595  | 24166  | 7744                    | 5208  | 8458  | 5726  | 9300   | 6159  | 3682                      | 3524  | 4253  | 4067  | 4466  | 4174  | 9.7%          | 9.1%   | 10.9%  | 9.0%                    | 9.4%   | 9.2%   | 9.4%   | 8.9%   | 9.0%   | 10.6%                     | 10.9%  | 10.7%  | 10.7%  | 11.3% | 11.2% |
| NY                                                                                                              | 44878         | 21244  | 23634  | 4054                    | 2656  | 4152  | 2775  | 4606   | 3001  | 4112                      | 3672  | 4148  | 3628  | 4323  | 3751  | 6.5%          | 4.6%   | 10.6%  | 4.7%                    | 4.8%   | 4.5%   | 4.6%   | 4.4%   | 4.4%   | 11.8%                     | 11.3%  | 10.4%  | 9.5%   | 10.9% | 10.1% |
| CA                                                                                                              | 43115         | 29131  | 13984  | 5837                    | 3712  | 5852  | 3888  | 5942   | 3900  | 2267                      | 2012  | 2532  | 2325  | 2497  | 2351  | 6.3%          | 6.2%   | 6.3%   | 6.8%                    | 6.7%   | 6.4%   | 6.4%   | 5.7%   | 5.7%   | 6.5%                      | 6.2%   | 6.3%   | 6.1%   | 6.3%  | 6.3%  |
| GA                                                                                                              | 34852         | 29167  | 5685   | 6116                    | 3377  | 6185  | 3344  | 6546   | 3599  | 851                       | 739   | 1104  | 979   | 1046  | 966   | 5.1%          | 6.3%   | 2.6%   | 7.1%                    | 6.1%   | 6.7%   | 5.5%   | 6.3%   | 5.3%   | 2.4%                      | 2.3%   | 2.8%   | 2.6%   | 2.6%  | 2.6%  |
| IL                                                                                                              | 34556         | 23072  | 11484  | 4489                    | 2712  | 4396  | 2847  | 5313   | 3315  | 1657                      | 1706  | 2116  | 2021  | 2000  | 1984  | 5.0%          | 4.9%   | 5.2%   | 5.2%                    | 4.9%   | 4.8%   | 4.7%   | 5.1%   | 4.9%   | 4.8%                      | 5.3%   | 5.3%   | 5.3%   | 5.0%  | 5.3%  |
| NC                                                                                                              | 27782         | 20065  | 7717   | 3679                    | 2029  | 4209  | 2443  | 4802   | 2903  | 1113                      | 1179  | 1338  | 1455  | 1315  | 1317  | 4.0%          | 4.3%   | 3.5%   | 4.3%                    | 3.7%   | 4.6%   | 4.0%   | 4.6%   | 4.2%   | 3.2%                      | 3.6%   | 3.4%   | 3.8%   | 3.3%  | 3.5%  |
| WI                                                                                                              | 27616         | 20906  | 6710   | 3859                    | 2664  | 4026  | 2903  | 4403   | 3051  | 1037                      | 960   | 1198  | 1173  | 1181  | 1161  | 4.0%          | 4.5%   | 3.0%   | 4.5%                    | 4.8%   | 4.4%   | 4.8%   | 4.2%   | 4.5%   | 3.0%                      | 3.0%   | 3.0%   | 3.1%   | 3.0%  | 3.1%  |
| MO                                                                                                              | 25637         | 16688  | 8949   | 2850                    | 2032  | 3205  | 2201  | 3749   | 2651  | 1419                      | 1305  | 1660  | 1562  | 1606  | 1397  | 3.7%          | 3.6%   | 4.0%   | 3.3%                    | 3.7%   | 3.5%   | 3.6%   | 3.6%   | 3.9%   | 4.1%                      | 4.0%   | 4.2%   | 4.1%   | 4.0%  | 3.8%  |
| AZ                                                                                                              | 23297         | 17290  | 6007   | 3413                    | 2248  | 3281  | 2220  | 3659   | 2469  | 1007                      | 946   | 1069  | 1041  | 1010  | 934   | 3.4%          | 3.7%   | 2.7%   | 4.0%                    | 4.1%   | 3.6%   | 3.7%   | 3.5%   | 3.6%   | 2.9%                      | 2.9%   | 2.7%   | 2.7%   | 2.5%  | 2.5%  |
| OH                                                                                                              | 20342         | 13208  | 7134   | 2235                    | 1548  | 2589  | 1797  | 2961   | 2078  | 1057                      | 1069  | 1301  | 1296  | 1217  | 1194  | 3.0%          | 2.8%   | 3.2%   | 2.6%                    | 2.8%   | 2.8%   | 3.0%   | 2.8%   | 3.0%   | 3.0%                      | 3.3%   | 3.3%   | 3.4%   | 3.1%  | 3.2%  |
| CT                                                                                                              | 20080         | 15164  | 4916   | 2799                    | 1920  | 2779  | 1933  | 3484   | 2249  | 813                       | 697   | 834   | 861   | 887   | 824   | 2.9%          | 3.3%   | 2.2%   | 3.3%                    | 3.5%   | 3.0%   | 3.2%   | 3.3%   | 3.3%   | 2.3%                      | 2.1%   | 2.1%   | 2.3%   | 2.2%  | 2.2%  |
| NJ                                                                                                              | 19488         | 10464  | 9024   | 2034                    | 1235  | 1942  | 1316  | 2360   | 1577  | 1550                      | 1411  | 1528  | 1411  | 1596  | 1528  | 2.8%          | 2.2%   | 4.1%   | 2.4%                    | 2.2%   | 2.1%   | 2.2%   | 2.3%   | 2.3%   | 4.5%                      | 4.4%   | 3.8%   | 3.7%   | 4.0%  | 4.1%  |
| IN                                                                                                              | 19039         | 14841  | 4198   | 2547                    | 1589  | 2930  | 1964  | 3534   | 2277  | 668                       | 590   | 753   | 782   | 714   | 691   | 2.8%          | 3.2%   | 1.9%   | 3.0%                    | 2.9%   | 3.2%   | 3.2%   | 3.4%   | 3.3%   | 1.9%                      | 1.8%   | 1.9%   | 2.1%   | 1.8%  | 1.9%  |
| CO                                                                                                              | 17613         | 11346  | 6267   | 2149                    | 1381  | 2258  | 1581  | 2319   | 1658  | 1025                      | 895   | 1154  | 1055  | 1097  | 1041  | 2.6%          | 2.4%   | 2.8%   | 2.5%                    | 2.5%   | 2.5%   | 2.6%   | 2.2%   | 2.4%   | 3.0%                      | 2.8%   | 2.9%   | 2.8%   | 2.8%  | 2.8%  |
| SC                                                                                                              | 14618         | 12975  | 1643   | 2594                    | 1441  | 2833  | 1568  | 2937   | 1602  | 223                       | 205   | 302   | 311   | 296   | 306   | 2.1%          | 2.8%   | 0.7%   | 3.0%                    | 2.6%   | 3.1%   | 2.6%   | 2.8%   | 2.3%   | 0.6%                      | 0.6%   | 0.8%   | 0.8%   | 0.7%  | 0.8%  |
| WA                                                                                                              | 13552         | 11145  | 2407   | 2145                    | 1448  | 2141  | 1504  | 2280   | 1627  | 326                       | 358   | 405   | 461   | 406   | 451   | 2.0%          | 2.4%   | 1.1%   | 2.5%                    | 2.6%   | 2.3%   | 2.5%   | 2.2%   | 2.4%   | 0.9%                      | 1.1%   | 1.0%   | 1.2%   | 1.0%  | 1.2%  |
| AL                                                                                                              | 13091         | 12396  | 695    | 2009                    | 1238  | 2716  | 1615  | 3007   | 1811  | 93                        | 101   | 110   | 143   | 114   | 134   | 1.9%          | 2.7%   | 0.3%   | 2.3%                    | 2.2%   | 3.0%   | 2.7%   | 2.9%   | 2.7%   | 0.3%                      | 0.3%   | 0.3%   | 0.4%   | 0.3%  | 0.4%  |
| VA                                                                                                              | 13052         | 6436   | 6616   | 1022                    | 643   | 1216  | 877   | 1618   | 1060  | 1089                      | 963   | 1165  | 1159  | 1158  | 1082  | 1.9%          | 1.4%   | 3.0%   | 1.2%                    | 1.2%   | 1.3%   | 1.4%   | 1.6%   | 1.6%   | 3.1%                      | 3.0%   | 2.9%   | 3.0%   | 2.9%  | 2.9%  |
| TN                                                                                                              | 11984         | 7155   | 4829   | 1237                    | 840   | 1456  | 954   | 1574   | 1094  | 702                       | 621   | 835   | 873   | 912   | 886   | 1.7%          | 1.5%   | 2.2%   | 1.4%                    | 1.5%   | 1.6%   | 1.6%   | 1.5%   | 1.6%   | 2.0%                      | 1.9%   | 2.1%   | 2.3%   | 2.3%  | 2.4%  |
| OR                                                                                                              | 11178         | 9279   | 1899   | 1698                    | 1079  | 1878  | 1203  | 2103   | 1318  | 309                       | 253   | 385   | 339   | 323   | 290   | 1.6%          | 2.0%   | 0.9%   | 2.0%                    | 1.9%   | 2.0%   | 2.0%   | 2.0%   | 1.9%   | 0.9%                      | 0.8%   | 1.0%   | 0.9%   | 0.8%  | 0.8%  |
| UT                                                                                                              | 10536         | 8929   | 1607   | 1619                    | 1168  | 1699  | 1203  | 1877   | 1363  | 197                       | 226   | 324   | 257   | 314   | 289   | 1.5%          | 1.9%   | 0.7%   | 1.9%                    | 2.1%   | 1.9%   | 2.0%   | 1.8%   | 2.0%   | 0.6%                      | 0.7%   | 0.8%   | 0.7%   | 0.8%  | 0.8%  |
| PA                                                                                                              | 8877          | 4914   | 3963   | 825                     | 533   | 953   | 633   | 1131   | 839   | 584                       | 529   | 669   | 717   | 729   | 735   | 1.3%          | 1.1%   | 1.8%   | 1.0%                    | 1.0%   | 1.0%   | 1.0%   | 1.1%   | 1.2%   | 1.7%                      | 1.6%   | 1.7%   | 1.9%   | 1.8%  | 2.0%  |
| AR                                                                                                              | 8688          | 6105   | 2583   | 1130                    | 708   | 1281  | 716   | 1491   | 779   | 364                       | 373   | 442   | 461   | 480   | 463   | 1.3%          | 1.3%   | 1.2%   | 1.3%                    | 1.3%   | 1.4%   | 1.2%   | 1.4%   | 1.1%   | 1.0%                      | 1.2%   | 1.1%   | 1.2%   | 1.2%  | 1.2%  |
| IA                                                                                                              | 8655          | 4567   | 4088   | 736                     | 516   | 838   | 641   | 1055   | 781   | 608                       | 611   | 787   | 765   | 657   | 660   | 1.3%          | 1.0%   | 1.8%   | 0.9%                    | 0.9%   | 0.9%   | 1.1%   | 1.0%   | 1.1%   | 1.8%                      | 1.9%   | 2.0%   | 2.0%   | 1.7%  | 1.8%  |
|                                                                                                                 |               |        |        |                         |       |       |       |        |       |                           |       |       |       |       |       |               |        |        |                         |        |        |        |        |        |                           |        |        |        |       |       |
