# Supplementary material for: Impact of patient gender on low back pain management before and after the COVID-19 pandemic in commercially insured and Medicare Advantage cohorts. A retrospective cohort study
Source: medRxiv preprint, doi:10.1101/2023.06.05.23290968, version 1 (2023-06-05)
Supplement: Supplement - Table 3 - Services By ADI [file 290968_file19.pdf]

| Supplement - Table 3 - Type of healthcare service provided by patient home address 5 digit zip code population measures of race/ethnicity and socioeconomic status |                             |                                 |       |             |       |            |       |                         |       |             |       |            |       |                                                                          |                   |                   |                         |                   |                   |
|--------------------------------------------------------------------------------------------------------------------------------------------------------------------|-----------------------------|---------------------------------|-------|-------------|-------|------------|-------|-------------------------|-------|-------------|-------|------------|-------|--------------------------------------------------------------------------|-------------------|-------------------|-------------------------|-------------------|-------------------|
|                                                                                                                                                                    |                             | % of Episodes Including Service |       |             |       |            |       |                         |       |             |       |            |       | Risk Ratio and 95% Confidence Interval Comparing Female to Male Baseline |                   |                   |                         |                   |                   |
|                                                                                                                                                                    |                             | Commercial Insurance (CI)       |       |             |       |            |       | Medicare Advantage (MA) |       |             |       |            |       | Commercial Insurance (CI)                                                |                   |                   | Medicare Advantage (MA) |                   |                   |
|                                                                                                                                                                    |                             | Pre-COVID                       |       | Early COVID |       | Late COVID |       | Pre-COVID               |       | Early COVID |       | Late COVID |       | Pre-COVID                                                                | Early COVID       | Late COVID        | Pre-COVID               | Early COVID       | Late COVID        |
|                                                                                                                                                                    |                             | F                               | M     | F           | M     | F          | M     | F                       | M     | F           | M     | F          | M     |                                                                          |                   |                   |                         |                   |                   |
| % of Population that is non-Hispanic white (NHW 0%-50%) and Area Deprivation Index (ADI 51-100) - Non-White, Low Income                                            |                             |                                 |       |             |       |            |       |                         |       |             |       |            |       |                                                                          |                   |                   |                         |                   |                   |
| First Line                                                                                                                                                         | At least one service        | 3453                            | 3208  | 4313        | 3972  | 4239       | 3739  | 14592                   | 8275  | 15752       | 8998  | 17272      | 9870  |                                                                          |                   |                   |                         |                   |                   |
|                                                                                                                                                                    | Manipulation - Chiropractic | 18.3%                           | 22.7% | 18.7%       | 23.2% | 18.1%      | 23.5% | 4.3%                    | 6.2%  | 3.9%        | 5.6%  | 4.5%       | 6.7%  | 0.81 (0.73, 0.89)                                                        | 0.81 (0.74, 0.88) | 0.77 (0.71, 0.84) | 0.68 (0.61, 0.76)       | 0.70 (0.63, 0.79) | 0.67 (0.60, 0.74) |
|                                                                                                                                                                    | Active Care                 | 18.2%                           | 18.8% | 16.3%       | 17.5% | 18.1%      | 19.0% | 9.9%                    | 9.6%  | 8.0%        | 7.9%  | 10.0%      | 10.2% | 0.97 (0.87, 1.07)                                                        | 0.93 (0.84, 1.02) | 0.95 (0.87, 1.05) | 1.03 (0.94, 1.11)       | 1.02 (0.93, 1.11) | 0.98 (0.91, 1.06) |
|                                                                                                                                                                    | Manual Therapy              | 10.0%                           | 9.6%  | 8.2%        | 8.5%  | 9.5%       | 8.8%  | 4.1%                    | 4.2%  | 3.4%        | 3.1%  | 4.0%       | 3.8%  | 1.05 (0.90, 1.21)                                                        | 0.97 (0.84, 1.12) | 1.08 (0.94, 1.24) | 0.97 (0.85, 1.10)       | 1.10 (0.95, 1.26) | 1.04 (0.92, 1.17) |
|                                                                                                                                                                    | Passive Therapy             | 10.3%                           | 12.7% | 10.1%       | 13.8% | 9.4%       | 12.9% | 1.8%                    | 1.8%  | 1.3%        | 1.6%  | 1.5%       | 1.7%  | 0.81 (0.71, 0.93)                                                        | 0.73 (0.65, 0.82) | 0.73 (0.64, 0.83) | 1.03 (0.84, 1.25)       | 0.82 (0.67, 1.02) | 0.87 (0.72, 1.05) |
|                                                                                                                                                                    | Manipulation - Osteopathic  | 0.6%                            | 0.6%  | 0.3%        | 0.3%  | 0.4%       | 0.4%  | 0.2%                    | 0.2%  | 0.2%        | 0.2%  | 0.2%       | 0.2%  | 1.14 (0.61, 2.11)                                                        | 0.85 (0.39, 1.86) | 1.13 (0.56, 2.28) | 1.10 (0.60, 2.01)       | 1.02 (0.53, 1.96) | 1.07 (0.57, 2.00) |
| Second Line                                                                                                                                                        | Acupuncture                 | 0.2%                            | 0.2%  | 0.2%        | 0.2%  | 0.4%       | 0.2%  | 0.1%                    | 0.1%  | 0.1%        | 0.1%  | 0.2%       | 0.1%  | 1.11 (0.34, 3.65)                                                        | 0.92 (0.37, 2.32) | 2.21 (0.86, 5.68) | 2.15 (0.80, 5.77)       | 1.07 (0.45, 2.53) | 1.24 (0.63, 2.45) |
|                                                                                                                                                                    | Imaging - Radiography       | 38.7%                           | 40.9% | 37.7%       | 37.7% | 41.0%      | 40.9% | 36.5%                   | 35.0% | 32.8%       | 32.7% | 36.9%      | 36.5% | 0.95 (0.89, 1.00)                                                        | 1.00 (0.95, 1.06) | 1.00 (0.95, 1.06) | 1.04 (1.01, 1.08)       | 1.00 (0.97, 1.04) | 1.01 (0.98, 1.05) |
|                                                                                                                                                                    | Rx NSAID                    | 29.2%                           | 29.5% | 30.4%       | 29.4% | 29.1%      | 29.0% | 25.9%                   | 25.3% | 26.8%       | 25.6% | 25.0%      | 24.7% | 0.99 (0.92, 1.07)                                                        | 1.03 (0.97, 1.11) | 1.00 (0.94, 1.08) | 1.02 (0.98, 1.07)       | 1.05 (1.00, 1.09) | 1.01 (0.97, 1.06) |
|                                                                                                                                                                    | Rx Muscle Relaxant          | 25.0%                           | 29.6% | 26.4%       | 28.4% | 23.6%      | 27.2% | 16.7%                   | 17.7% | 16.4%       | 18.4% | 16.8%      | 18.1% | 0.84 (0.78, 0.91)                                                        | 0.93 (0.87, 1.00) | 0.87 (0.80, 0.93) | 0.95 (0.89, 1.00)       | 0.89 (0.84, 0.94) | 0.93 (0.88, 0.98) |
|                                                                                                                                                                    | Rx Oral Steroid             | 10.7%                           | 13.2% | 9.0%        | 12.2% | 8.4%       | 10.2% | 7.3%                    | 8.6%  | 6.2%        | 7.9%  | 5.4%       | 6.8%  | 0.81 (0.71, 0.93)                                                        | 0.74 (0.65, 0.84) | 0.82 (0.71, 0.94) | 0.85 (0.78, 0.94)       | 0.79 (0.72, 0.87) | 0.80 (0.73, 0.88) |
|                                                                                                                                                                    | Imaging - MRI               | 8.9%                            | 10.6% | 9.1%        | 8.9%  | 10.3%      | 10.4% | 11.9%                   | 14.1% | 11.6%       | 13.5% | 14.2%      | 15.8% | 0.84 (0.72, 0.97)                                                        | 1.02 (0.89, 1.17) | 0.99 (0.87, 1.13) | 0.85 (0.79, 0.91)       | 0.86 (0.81, 0.92) | 0.90 (0.85, 0.95) |
| Third Line                                                                                                                                                         | Rx Gabapentin               | 1.9%                            | 2.1%  | 1.8%        | 2.4%  | 1.8%       | 2.4%  | 2.3%                    | 2.5%  | 2.4%        | 2.1%  | 1.8%       | 1.9%  | 0.90 (0.64, 1.26)                                                        | 0.76 (0.56, 1.02) | 0.76 (0.56, 1.02) | 0.90 (0.76, 1.07)       | 1.14 (0.96, 1.36) | 0.96 (0.80, 1.15) |
|                                                                                                                                                                    | Rx Other                    | 6.4%                            | 5.5%  | 6.9%        | 5.8%  | 6.8%       | 6.2%  | 12.4%                   | 11.0% | 14.8%       | 13.8% | 12.5%      | 11.4% | 1.16 (0.96, 1.41)                                                        | 1.18 (1.00, 1.39) | 1.09 (0.92, 1.29) | 1.13 (1.05, 1.21)       | 1.07 (1.01, 1.14) | 1.10 (1.03, 1.18) |
|                                                                                                                                                                    | Rx Opioid                   | 11.1%                           | 12.4% | 10.6%       | 11.3% | 10.2%      | 10.0% | 18.6%                   | 20.3% | 17.8%       | 19.1% | 16.9%      | 17.7% | 0.89 (0.78, 1.01)                                                        | 0.94 (0.83, 1.07) | 1.02 (0.89, 1.16) | 0.92 (0.87, 0.97)       | 0.93 (0.88, 0.99) | 0.95 (0.90, 1.00) |
|                                                                                                                                                                    | Spinal Injection            | 4.6%                            | 4.6%  | 3.9%        | 4.6%  | 4.5%       | 4.5%  | 6.9%                    | 7.2%  | 6.5%        | 6.7%  | 7.5%       | 7.3%  | 0.99 (0.80, 1.23)                                                        | 0.86 (0.70, 1.06) | 1.00 (0.81, 1.22) | 0.97 (0.88, 1.07)       | 0.98 (0.89, 1.08) | 1.02 (0.93, 1.11) |
|                                                                                                                                                                    | Imaging - CT                | 3.4%                            | 4.2%  | 3.0%        | 4.3%  | 4.2%       | 4.3%  | 7.0%                    | 7.4%  | 6.7%        | 7.0%  | 7.5%       | 8.6%  | 0.82 (0.64, 1.04)                                                        | 0.69 (0.55, 0.87) | 0.99 (0.80, 1.22) | 0.96 (0.87, 1.05)       | 0.95 (0.86, 1.04) | 0.87 (0.80, 0.94) |
|                                                                                                                                                                    | Surgery                     | 0.4%                            | 0.9%  | 0.4%        | 0.5%  | 0.5%       | 0.6%  | 0.2%                    | 0.8%  | 0.3%        | 0.6%  | 0.3%       | 0.6%  | 0.40 (0.21, 0.77)                                                        | 0.83 (0.45, 1.55) | 0.88 (0.48, 1.61) | 0.30 (0.20, 0.45)       | 0.51 (0.35, 0.75) | 0.44 (0.30, 0.65) |
| NHW 0-50 and ADI 0-50 - Non-White, High Income                                                                                                                     |                             |                                 |       |             |       |            |       |                         |       |             |       |            |       |                                                                          |                   |                   |                         |                   |                   |
| First Line                                                                                                                                                         | At least one service        | 6344                            | 5480  | 6970        | 6131  | 7189       | 6362  | 10708                   | 6432  | 10606       | 6706  | 11677      | 7371  |                                                                          |                   |                   |                         |                   |                   |
|                                                                                                                                                                    | Manipulation - Chiropractic | 16.6%                           | 20.5% | 16.9%       | 20.8% | 16.5%      | 20.4% | 4.2%                    | 7.1%  | 3.8%        | 5.8%  | 4.2%       | 6.1%  | 0.81 (0.75, 0.87)                                                        | 0.81 (0.76, 0.87) | 0.81 (0.76, 0.87) | 0.60 (0.53, 0.68)       | 0.64 (0.56, 0.74) | 0.69 (0.61, 0.78) |
|                                                                                                                                                                    | Active Care                 | 24.9%                           | 25.4% | 21.1%       | 22.3% | 23.2%      | 23.0% | 14.2%                   | 15.8% | 10.2%       | 11.4% | 14.0%      | 13.6% | 0.98 (0.92, 1.04)                                                        | 0.95 (0.89, 1.01) | 1.01 (0.95, 1.07) | 0.90 (0.83, 0.97)       | 0.89 (0.82, 0.97) | 1.02 (0.95, 1.10) |
|                                                                                                                                                                    | Manual Therapy              | 16.9%                           | 16.0% | 14.0%       | 13.7% | 14.8%      | 13.8% | 8.5%                    | 9.5%  | 5.7%        | 6.3%  | 7.1%       | 7.2%  | 1.05 (0.97, 1.14)                                                        | 1.02 (0.94, 1.12) | 1.07 (0.98, 1.16) | 0.90 (0.82, 1.00)       | 0.91 (0.80, 1.02) | 0.98 (0.88, 1.08) |
|                                                                                                                                                                    | Passive Therapy             | 11.7%                           | 13.9% | 10.8%       | 11.8% | 10.1%      | 11.6% | 2.9%                    | 4.0%  | 1.9%        | 2.4%  | 2.5%       | 2.7%  | 0.84 (0.77, 0.93)                                                        | 0.92 (0.83, 1.01) | 0.88 (0.80, 0.97) | 0.73 (0.62, 0.85)       | 0.76 (0.62, 0.93) | 0.92 (0.77, 1.10) |
|                                                                                                                                                                    | Manipulation - Osteopathic  | 0.6%                            | 0.7%  | 0.4%        | 0.6%  | 0.6%       | 0.3%  | 0.3%                    | 0.2%  | 0.3%        | 0.2%  | 0.2%       | 0.1%  | 0.84 (0.55, 1.30)                                                        | 0.71 (0.44, 1.15) | 1.61 (0.96, 2.70) | 1.13 (0.61, 2.06)       | 1.56 (0.82, 2.96) | 1.43 (0.71, 2.91) |
| Second Line                                                                                                                                                        | Acupuncture                 | 0.7%                            | 0.6%  | 0.8%        | 0.4%  | 0.8%       | 0.6%  | 1.2%                    | 1.2%  | 0.9%        | 0.8%  | 1.3%       | 1.4%  | 1.16 (0.75, 1.79)                                                        | 1.79 (1.13, 2.84) | 1.37 (0.92, 2.06) | 1.02 (0.78, 1.35)       | 1.11 (0.80, 1.55) | 0.94 (0.73, 1.21) |
|                                                                                                                                                                    | Imaging - Radiography       | 37.4%                           | 36.9% | 36.2%       | 36.6% | 40.7%      | 41.3% | 33.3%                   | 31.2% | 29.7%       | 28.5% | 35.9%      | 32.7% | 1.01 (0.97, 1.06)                                                        | 0.99 (0.94, 1.03) | 0.99 (0.95, 1.03) | 1.07 (1.02, 1.12)       | 1.04 (0.99, 1.09) | 1.10 (1.05, 1.14) |
|                                                                                                                                                                    | Rx NSAID                    | 29.2%                           | 30.2% | 30.3%       | 30.7% | 27.4%      | 27.4% | 27.9%                   | 29.0% | 28.9%       | 27.1% | 26.4%      | 26.0% | 0.97 (0.91, 1.02)                                                        | 0.99 (0.94, 1.04) | 1.00 (0.95, 1.06) | 0.96 (0.92, 1.01)       | 1.06 (1.01, 1.12) | 1.01 (0.96, 1.06) |
|                                                                                                                                                                    | Rx Muscle Relaxant          | 22.7%                           | 25.2% | 22.5%       | 23.7% | 20.6%      | 22.1% | 13.5%                   | 15.1% | 14.2%       | 14.2% | 13.8%      | 15.5% | 0.90 (0.85, 0.96)                                                        | 0.95 (0.89, 1.01) | 0.93 (0.87, 0.99) | 0.90 (0.83, 0.97)       | 1.00 (0.93, 1.08) | 0.89 (0.83, 0.96) |
|                                                                                                                                                                    | Rx Oral Steroid             | 8.6%                            | 12.1% | 7.7%        | 9.9%  | 6.9%       | 8.8%  | 7.1%                    | 8.3%  | 5.3%        | 7.1%  | 4.6%       | 6.1%  | 0.71 (0.64, 0.79)                                                        | 0.78 (0.70, 0.88) | 0.78 (0.70, 0.88) | 0.85 (0.76, 0.95)       | 0.74 (0.66, 0.83) | 0.75 (0.66, 0.85) |
|                                                                                                                                                                    | Imaging - MRI               | 10.0%                           | 11.6% | 9.8%        | 11.5% | 12.2%      | 13.4% | 13.6%                   | 14.8% | 13.3%       | 14.7% | 16.1%      | 18.1% | 0.86 (0.78, 0.96)                                                        | 0.85 (0.77, 0.94) | 0.91 (0.83, 0.99) | 0.92 (0.85, 0.99)       | 0.90 (0.83, 0.97) | 0.89 (0.83, 0.95) |
| Third Line                                                                                                                                                         | Rx Gabapentin               | 1.9%                            | 2.6%  | 2.1%        | 2.1%  | 2.0%       | 2.4%  | 2.8%                    | 2.8%  | 2.5%        | 2.8%  | 2.3%       | 2.4%  | 0.75 (0.59, 0.96)                                                        | 0.99 (0.79, 1.26) | 0.83 (0.67, 1.04) | 0.97 (0.81, 1.17)       | 0.89 (0.74, 1.07) | 0.94 (0.78, 1.13) |
|                                                                                                                                                                    | Rx Other                    | 6.5%                            | 6.7%  | 7.3%        | 6.4%  | 6.7%       | 6.9%  | 14.7%                   | 13.2% | 17.8%       | 16.7% | 14.1%      | 14.0% | 0.97 (0.84, 1.11)                                                        | 1.15 (1.01, 1.30) | 0.98 (0.86, 1.11) | 1.11 (1.03, 1.20)       | 1.07 (1.00, 1.14) | 1.01 (0.94, 1.08) |
|                                                                                                                                                                    | Rx Opioid                   | 8.9%                            | 9.6%  | 8.3%        | 9.4%  | 8.2%       | 8.4%  | 15.7%                   | 16.9% | 15.3%       | 16.4% | 13.8%      | 15.5% | 0.92 (0.83, 1.04)                                                        | 0.88 (0.79, 0.99) | 0.98 (0.88, 1.10) | 0.93 (0.86, 0.99)       | 0.93 (0.87, 1.00) | 0.89 (0.83, 0.96) |
|                                                                                                                                                                    | Spinal Injection            | 4.8%                            | 5.8%  | 4.7%        | 5.6%  | 4.9%       | 5.4%  | 6.8%                    | 7.0%  | 6.2%        | 6.6%  | 6.9%       | 7.6%  | 0.83 (0.71, 0.97                                                         |                   |                   |                         |                   |                   |
