# Supplementary material for: Impact of patient gender on low back pain management before and after the COVID-19 pandemic in commercially insured and Medicare Advantage cohorts. A retrospective cohort study
Source: medRxiv preprint, doi:10.1101/2023.06.05.23290968, version 1 (2023-06-05)
Supplement: Supplement - Table 3 - Services By Type of HCP [file 290968_file20.pdf]

| Supplement - Table 3 - Type of healthcare service provided by type of healthcare provider (HCP) initially contacted |                             |                                 |       |             |       |            |       |                         |       |             |       |            |       |                                                                          |                   |                   |                         |                   |                   |
|---------------------------------------------------------------------------------------------------------------------|-----------------------------|---------------------------------|-------|-------------|-------|------------|-------|-------------------------|-------|-------------|-------|------------|-------|--------------------------------------------------------------------------|-------------------|-------------------|-------------------------|-------------------|-------------------|
|                                                                                                                     |                             | % of Episodes Including Service |       |             |       |            |       |                         |       |             |       |            |       | Risk Ratio and 95% Confidence Interval Comparing Female to Male Baseline |                   |                   |                         |                   |                   |
|                                                                                                                     |                             | Commercial Insurance (CI)       |       |             |       |            |       | Medicare Advantage (MA) |       |             |       |            |       | Commercial Insurance (CI)                                                |                   |                   | Medicare Advantage (MA) |                   |                   |
|                                                                                                                     |                             | Pre-COVID                       |       | Early COVID |       | Late COVID |       | Pre-COVID               |       | Early COVID |       | Late COVID |       | Pre-COVID                                                                | Early COVID       | Late COVID        | Pre-COVID               | Early COVID       | Late COVID        |
|                                                                                                                     |                             | F                               | M     | F           | M     | F          | M     | F                       | M     | F           | M     | F          | M     |                                                                          |                   |                   |                         |                   |                   |
| Type of HCP Initially Contacted - Chiropractor (DC)                                                                 |                             |                                 |       |             |       |            |       |                         |       |             |       |            |       |                                                                          |                   |                   |                         |                   |                   |
| At least one service                                                                                                |                             | 8682                            | 9185  | 10118       | 10761 | 9338       | 10158 | 7059                    | 6506  | 6767        | 6393  | 8292       | 7480  |                                                                          |                   |                   |                         |                   |                   |
| First Line                                                                                                          | Manipulation - Chiropractic | 91.5%                           | 92.9% | 92.2%       | 93.3% | 93.1%      | 93.1% | 98.1%                   | 98.4% | 98.3%       | 99.0% | 98.5%      | 99.1% | 0.98 (0.98, 0.99)                                                        | 0.99 (0.98, 0.99) | 1.00 (0.99, 1.01) | 1.00 (0.99, 1.00)       | 0.99 (0.99, 1.00) | 0.99 (0.99, 1.00) |
|                                                                                                                     | Active Care                 | 34.5%                           | 34.5% | 32.7%       | 31.6% | 33.1%      | 32.4% | 5.4%                    | 5.2%  | 4.7%        | 4.3%  | 5.0%       | 4.6%  | 1.00 (0.96, 1.04)                                                        | 1.03 (0.99, 1.08) | 1.02 (0.98, 1.06) | 1.04 (0.91, 1.20)       | 1.09 (0.93, 1.28) | 1.09 (0.95, 1.25) |
|                                                                                                                     | Manual Therapy              | 17.4%                           | 16.6% | 15.9%       | 15.2% | 14.3%      | 13.9% | 3.3%                    | 3.0%  | 3.0%        | 2.5%  | 3.0%       | 3.0%  | 1.04 (0.98, 1.11)                                                        | 1.05 (0.98, 1.11) | 1.03 (0.96, 1.10) | 1.10 (0.91, 1.33)       | 1.16 (0.95, 1.42) | 0.97 (0.81, 1.16) |
|                                                                                                                     | Passive Therapy             | 33.9%                           | 37.1% | 33.5%       | 35.0% | 31.3%      | 34.1% | 4.6%                    | 4.6%  | 4.1%        | 4.5%  | 3.5%       | 3.8%  | 0.91 (0.88, 0.95)                                                        | 0.96 (0.92, 1.00) | 0.92 (0.88, 0.96) | 1.01 (0.87, 1.18)       | 0.91 (0.78, 1.07) | 0.94 (0.80, 1.10) |
|                                                                                                                     | Manipulation - Osteopathic  | 0.1%                            | 0.1%  | 0.1%        | 0.1%  | 0.1%       | 0.1%  | 0.0%                    | 0.1%  | 0.1%        | 0.1%  | 0.1%       | 0.1%  | 0.79 (0.28, 2.29)                                                        | 0.83 (0.31, 2.22) | 1.40 (0.52, 3.75) | 0.46 (0.08, 2.52)       | 1.89 (0.65, 5.52) | 0.90 (0.32, 2.57) |
|                                                                                                                     | Acupuncture                 | 0.7%                            | 0.6%  | 0.6%        | 0.3%  | 0.6%       | 0.5%  | 0.4%                    | 0.3%  | 0.6%        | 0.4%  | 0.7%       | 0.3%  | 1.18 (0.81, 1.72)                                                        | 1.73 (1.14, 2.64) | 1.24 (0.85, 1.82) | 1.20 (0.67, 2.14)       | 1.28 (0.79, 2.09) | 2.41 (1.46, 3.97) |
| Second Line                                                                                                         | Imaging - Radiography       | 17.6%                           | 20.8% | 18.9%       | 21.0% | 19.5%      | 21.5% | 7.2%                    | 7.1%  | 7.6%        | 7.7%  | 8.0%       | 7.9%  | 0.85 (0.80, 0.90)                                                        | 0.90 (0.85, 0.95) | 0.90 (0.86, 0.96) | 1.01 (0.89, 1.14)       | 0.99 (0.88, 1.11) | 1.01 (0.91, 1.12) |
|                                                                                                                     | Rx NSAID                    | 4.4%                            | 3.2%  | 3.7%        | 3.1%  | 4.0%       | 3.4%  | 3.3%                    | 3.3%  | 3.5%        | 3.2%  | 3.9%       | 3.3%  | 1.37 (1.18, 1.59)                                                        | 1.20 (1.04, 1.38) | 1.18 (1.02, 1.37) | 1.01 (0.84, 1.21)       | 1.10 (0.92, 1.33) | 1.19 (1.01, 1.40) |
|                                                                                                                     | Rx Muscle Relaxant          | 2.4%                            | 2.3%  | 2.0%        | 2.5%  | 1.8%       | 2.4%  | 1.4%                    | 1.8%  | 1.3%        | 1.9%  | 1.5%       | 1.5%  | 1.02 (0.84, 1.23)                                                        | 0.81 (0.68, 0.97) | 0.76 (0.63, 0.92) | 0.80 (0.61, 1.05)       | 0.71 (0.54, 0.94) | 1.05 (0.82, 1.35) |
|                                                                                                                     | Rx Oral Steroid             | 2.2%                            | 2.3%  | 1.5%        | 2.0%  | 1.7%       | 2.2%  | 1.9%                    | 2.2%  | 1.7%        | 2.0%  | 1.7%       | 1.9%  | 0.97 (0.80, 1.18)                                                        | 0.75 (0.61, 0.92) | 0.76 (0.62, 0.93) | 0.83 (0.66, 1.05)       | 0.84 (0.66, 1.08) | 0.93 (0.74, 1.18) |
|                                                                                                                     | Imaging - MRI               | 1.4%                            | 1.9%  | 1.2%        | 1.7%  | 1.5%       | 1.9%  | 1.5%                    | 2.0%  | 1.9%        | 1.9%  | 2.0%       | 2.6%  | 0.71 (0.56, 0.89)                                                        | 0.71 (0.57, 0.89) | 0.83 (0.67, 1.03) | 0.77 (0.59, 0.99)       | 1.02 (0.79, 1.30) | 0.75 (0.61, 0.93) |
|                                                                                                                     | Rx Gabapentin               | 0.1%                            | 0.2%  | 0.1%        | 0.2%  | 0.2%       | 0.2%  | 0.3%                    | 0.4%  | 0.2%        | 0.3%  | 0.2%       | 0.3%  | 0.50 (0.23, 1.11)                                                        | 0.53 (0.27, 1.06) | 0.90 (0.49, 1.65) | 0.69 (0.38, 1.27)       | 0.52 (0.25, 1.08) | 0.53 (0.27, 1.02) |
| Third Line                                                                                                          | Rx Other                    | 1.3%                            | 1.0%  | 1.1%        | 0.9%  | 1.4%       | 1.2%  | 2.1%                    | 1.7%  | 2.0%        | 1.5%  | 1.7%       | 1.8%  | 1.30 (0.99, 1.71)                                                        | 1.29 (0.98, 1.69) | 1.18 (0.92, 1.50) | 1.24 (0.98, 1.58)       | 1.36 (1.05, 1.76) | 0.96 (0.76, 1.22) |
|                                                                                                                     | Rx Opioid                   | 2.6%                            | 2.1%  | 2.7%        | 2.3%  | 2.5%       | 2.2%  | 3.1%                    | 3.6%  | 3.2%        | 3.5%  | 3.1%       | 3.6%  | 1.25 (1.03, 1.51)                                                        | 1.18 (1.00, 1.40) | 1.16 (0.97, 1.39) | 0.86 (0.72, 1.03)       | 0.92 (0.76, 1.10) | 0.86 (0.72, 1.01) |
|                                                                                                                     | Spinal Injection            | 0.8%                            | 1.1%  | 0.8%        | 1.0%  | 0.8%       | 0.8%  | 1.2%                    | 1.5%  | 1.2%        | 1.6%  | 1.1%       | 1.4%  | 0.68 (0.50, 0.93)                                                        | 0.78 (0.59, 1.04) | 0.96 (0.71, 1.31) | 0.80 (0.60, 1.07)       | 0.71 (0.53, 0.95) | 0.79 (0.60, 1.04) |
|                                                                                                                     | Imaging - CT                | 0.3%                            | 0.2%  | 0.2%        | 0.3%  | 0.1%       | 0.3%  | 0.6%                    | 0.5%  | 0.5%        | 0.5%  | 0.8%       | 0.9%  | 1.22 (0.66, 2.26)                                                        | 0.60 (0.33, 1.09) | 0.45 (0.24, 0.83) | 1.11 (0.71, 1.73)       | 0.89 (0.55, 1.43) | 0.94 (0.68, 1.32) |
| Spinal Surgery                                                                                                      |                             | 0.1%                            | 0.2%  | 0.1%        | 0.2%  | 0.1%       | 0.2%  | 0.0%                    | 0.1%  | 0.1%        | 0.2%  | 0.0%       | 0.1%  | 0.73 (0.34, 1.57)                                                        | 0.56 (0.27, 1.15) | 0.29 (0.11, 0.77) | 0.18 (0.02, 1.58)       | 0.71 (0.30, 1.68) | 0.45 (0.11, 1.80) |
| Type of HCP Initially Contacted - Primary Care Provider (PCP)                                                       |                             |                                 |       |             |       |            |       |                         |       |             |       |            |       |                                                                          |                   |                   |                         |                   |                   |
| At least one service                                                                                                |                             | 7071                            | 6626  | 8992        | 8207  | 7860       | 7304  | 27246                   | 17255 | 32374       | 20906 | 30894      | 19987 |                                                                          |                   |                   |                         |                   |                   |
| First Line                                                                                                          | Manipulation - Chiropractic | 3.8%                            | 4.4%  | 3.8%        | 3.8%  | 3.6%       | 4.3%  | 1.6%                    | 2.1%  | 1.4%        | 1.9%  | 1.8%       | 2.4%  | 0.87 (0.74, 1.03)                                                        | 0.99 (0.85, 1.14) | 0.85 (0.72, 0.99) | 0.74 (0.64, 0.85)       | 0.72 (0.63, 0.82) | 0.76 (0.67, 0.86) |
|                                                                                                                     | Active Care                 | 11.4%                           | 11.2% | 9.2%        | 10.1% | 11.1%      | 11.4% | 6.7%                    | 7.4%  | 5.0%        | 5.8%  | 7.2%       | 7.6%  | 1.02 (0.92, 1.12)                                                        | 0.91 (0.83, 0.99) | 0.97 (0.89, 1.06) | 0.90 (0.84, 0.97)       | 0.86 (0.80, 0.92) | 0.94 (0.88, 1.00) |
|                                                                                                                     | Manual Therapy              | 8.1%                            | 7.7%  | 6.5%        | 6.5%  | 7.4%       | 7.6%  | 3.7%                    | 3.9%  | 2.8%        | 3.1%  | 3.6%       | 3.7%  | 1.06 (0.94, 1.18)                                                        | 0.99 (0.88, 1.11) | 0.98 (0.88, 1.10) | 0.95 (0.86, 1.04)       | 0.89 (0.80, 0.98) | 0.97 (0.88, 1.06) |
|                                                                                                                     | Passive Therapy             | 5.0%                            | 5.2%  | 3.5%        | 4.1%  | 3.6%       | 4.1%  | 1.4%                    | 1.5%  | 1.0%        | 1.2%  | 1.1%       | 1.3%  | 0.95 (0.82, 1.10)                                                        | 0.87 (0.75, 1.01) | 0.87 (0.74, 1.02) | 0.88 (0.75, 1.03)       | 0.85 (0.72, 1.01) | 0.89 (0.76, 1.05) |
|                                                                                                                     | Manipulation - Osteopathic  | 1.9%                            | 2.1%  | 1.6%        | 1.5%  | 1.5%       | 1.4%  | 0.7%                    | 0.6%  | 0.5%        | 0.5%  | 0.5%       | 0.5%  | 0.90 (0.72, 1.14)                                                        | 1.10 (0.86, 1.39) | 1.08 (0.83, 1.41) | 1.22 (0.96, 1.54)       | 1.07 (0.84, 1.37) | 0.97 (0.75, 1.25) |
|                                                                                                                     | Acupuncture                 | 0.4%                            | 0.2%  | 0.2%        | 0.2%  | 0.2%       | 0.1%  | 0.1%                    | 0.1%  | 0.1%        | 0.1%  | 0.2%       | 0.2%  | 2.13 (1.05, 4.32)                                                        | 0.97 (0.50, 1.87) | 1.76 (0.78, 3.94) | 1.61 (0.85, 3.05)       | 1.23 (0.73, 2.09) | 1.00 (0.67, 1.49) |
| Second Line                                                                                                         | Imaging - Radiography       | 23.9%                           | 25.3% | 20.8%       | 22.9% | 24.7%      | 26.2% | 20.7%                   | 20.6% | 17.3%       | 18.0% | 22.4%      | 22.4% | 0.95 (0.89, 1.00)                                                        | 0.91 (0.86, 0.96) | 0.94 (0.89, 1.00) | 1.01 (0.97, 1.04)       | 0.97 (0.93, 1.00) | 1.00 (0.97, 1.03) |
|                                                                                                                     | Rx NSAID                    | 43.7%                           | 43.3% | 44.2%       | 41.6% | 43.1%      | 41.9% | 33.2%                   | 31.7% | 32.0%       | 30.6% | 32.7%      | 30.6% | 1.01 (0.97, 1.05)                                                        | 1.06 (1.03, 1.10) | 1.03 (0.99, 1.07) | 1.05 (1.02, 1.08)       | 1.04 (1.02, 1.07) | 1.07 (1.04, 1.09) |
|                                                                                                                     | Rx Muscle Relaxant          | 38.3%                           | 44.6% | 38.1%       | 43.2% | 35.6%      | 40.7% | 19.8%                   | 21.5% | 19.1%       | 20.7% | 20.5%      | 23.3% | 0.86 (0.83, 0.90)                                                        | 0.88 (0.85, 0.91) | 0.87 (0.84, 0.91) | 0.92 (0.89, 0.96)       | 0.92 (0.89, 0.95) | 0.88 (0.85, 0.91) |
|                                                                                                                     | Rx Oral Steroid             | 16.8%                           | 22.6% | 14.5%       | 20.2% | 13.3%      | 17.9% | 11.2%                   | 13.8% | 8.8%        | 11.2% | 8.8%       | 10.5% | 0.74 (0.69, 0.80)                                                        | 0.72 (0.67, 0.77) | 0.74 (0.69, 0.80) | 0.82 (0.78, 0.86)       | 0.79 (0.75, 0.83) | 0.84 (0.79, 0.88) |
|                                                                                                                     | Imaging - MRI               | 5.5%                            | 7.3%  | 4.8%        | 6.5%  | 5.8%       | 7.7%  | 6.1%                    | 7.5%  | 5.5%        | 6.9%  | 7.5%       | 9.1%  | 0.75 (0.66, 0.86)                                                        | 0.73 (0.64, 0.82) | 0.75 (0.67, 0.85) | 0.82 (0.76, 0.87)       | 0.80 (0.75, 0.86) | 0.82 (0.78, 0.87) |
|                                                                                                                     | Rx Gabapentin               | 2.6%                            | 2.5%  | 2.6%        | 3.1%  | 2.4%       | 3.3%  | 3.9%                    | 4.2%  | 3.3%        | 3.5%  | 2.8%       | 2.9%  | 1.04 (0.84, 1.28)                                                        | 0.83 (0.70, 0.99) | 0.74 (0.61, 0.89) | 0.93 (0.84, 1.02)       | 0.96 (0.88, 1.05) | 0.95 (0.86, 1.05) |
| Third Line                                                                                                          | Rx Other                    | 13.9%                           | 12.2% | 14.8%       | 13.4% | 14.2%      | 13.8% | 23.8%                   | 23.1% | 27.3%       | 26.4% | 24.3%      | 23.7% | 1.13 (1.04, 1.24)                                                        | 1.11 (1.03, 1.19) | 1.03 (0.95, 1.11) | 1.03 (1.00, 1.07)       | 1.03 (1.00, 1.06) | 1.02 (0.99, 1.06) |
|                                                                                                                     | Rx Opioid                   | 15.6%                           | 16.2% | 15.1%       | 15.9% | 14.3%      | 14.4% | 23.8%                   | 24.4% | 22.8%       | 23.2% | 22.4%      | 23.3% | 0.96 (0.89, 1.04)                                                        | 0.95 (0.89, 1.02) | 1.00 (0.92, 1.08) | 0.98 (0.94, 1.01)       | 0.98 (0.95, 1.01) | 0.96 (0.93, 0.99) |
|                                                                                                                     | Spinal                      |                                 |       |             |       |            |       |                         |       |             |       |            |       |                                                                          |                   |                   |                         |                   |                   |
