# Supplementary material for: Impact of patient gender on low back pain management before and after the COVID-19 pandemic in commercially insured and Medicare Advantage cohorts. A retrospective cohort study
Source: bioRxiv or medRxiv preprint supplement (doi:10.1101/2023.06.05.23290968), 2023-06-05
Supplement: Supplementary file [file media-1.pdf]

## Supplement - Episode Duration

|                                     | Pre-COVID     |               | Early COVID   |               | Late COVID    |              |
|-------------------------------------|---------------|---------------|---------------|---------------|---------------|--------------|
|                                     | Female        | Male          | Female        | Male          | Female        | Male         |
| <b>Original Cohort</b>              |               |               |               |               |               |              |
| Episode Count                       |               |               |               |               |               |              |
| Commercially Insured                | 81446         | 69315         | 84285         | 73838         | 66497         | 58461        |
| Medicare Advantage                  | 329705        | 200878        | 303007        | 190566        | 225936        | 142906       |
| Episode Duration - Median (Q1, Q3)  |               |               |               |               |               |              |
| Commercially Insured                | 136 (22, 300) | 111 (15, 286) | 103 (15, 258) | 84 (8, 235)   | 58 (6, 156)   | 49 (4, 141)  |
| Medicare Advantage                  | 251 (84, 468) | 243 (73, 446) | 209 (62, 316) | 197 (55, 313) | 104 (22, 201) | 97 (20, 196) |
| <b>Episodes &lt;91 Day Duration</b> |               |               |               |               |               |              |
| Episode Count                       |               |               |               |               |               |              |
| Commercially Insured                | 34739         | 32419         | 39913         | 38137         | 39670         | 37165        |
| Medicare Advantage                  | 85801         | 55457         | 91648         | 60758         | 104148        | 68313        |
| Episode Count - % <91 Day Duration  |               |               |               |               |               |              |
| Commercially Insured                | 42.7%         | 46.8%         | 47.4%         | 51.6%         | 59.7%         | 63.6%        |
| Medicare Advantage                  | 26.0%         | 27.6%         | 30.2%         | 31.9%         | 46.1%         | 47.8%        |
| Episode Duration - Median (Q1, Q3)  |               |               |               |               |               |              |
| Commercially Insured                | 13 (1, 43)    | 11 (1, 41)    | 12 (1, 44)    | 10 (1, 42)    | 14 (1, 45)    | 12 (1, 43)   |
| Medicare Advantage                  | 15 (1, 49)    | 15 (1, 48)    | 12 (1, 49)    | 14 (1, 49)    | 16 (1, 51)    | 17 (1, 50)   |
