# Supplementary material for: Impact of patient gender on low back pain management before and after the COVID-19 pandemic in commercially insured and Medicare Advantage cohorts. A retrospective cohort study
Source: bioRxiv or medRxiv preprint supplement (doi:10.1101/2023.06.05.23290968), 2023-06-05
Supplement: Supplementary file [file media-2.pdf]

**Supplement - Healthcare provider (HCP) gender distribution of types of HCP initially contacted by individuals with LBP**

| Type of HCP                        |                                            | % Female | Source                                          |
|------------------------------------|--------------------------------------------|----------|-------------------------------------------------|
| Non-Rx                             | Doctor of Chiropractic (DC)                | 32%      | 2020 - National Board of Chiropractic Examiners |
|                                    | Physical Therapist (PT)                    | 65%      | 2020 - American Physical Therapy Association    |
|                                    | Licensed Acupuncturist (LAc)               | 65%      | 2023 - Zippia                                   |
| Primary Care                       | Primary Care Physician (PCP)               | 40%      | 2020 - American Medical Association             |
|                                    | Nurse Practitioner (Nurse)                 | 87%      | 2023 - Zippia                                   |
|                                    | Physician Assistant (PA)                   | 67%      | 2023 - Zippia                                   |
|                                    | Doctor of Osteopathy (DO)                  | 43%      | 2022 - American Osteopathic Association         |
| Physician Specialist               | Orthopedic Surgeon (OS)                    | 7%       | 2020 - American Medical Association             |
|                                    | Physical Medicine and Rehabilitation (PMR) | 36%      | 2020 - American Medical Association             |
|                                    | Pain Management (PM)                       | 19%      | 2020 - American Medical Association             |
|                                    | Neurologist (Neuro)                        | 31%      | 2020 - American Medical Association             |
|                                    | Rheumatologist (Rheum)                     | 46%      | 2020 - American Medical Association             |
|                                    | Neurosurgeon (NS)                          | 9%       | 2020 - American Medical Association             |
|                                    | MD Other (Oth)                             | -        |                                                 |
| Emergency Medicine/<br>Urgent Care | Hospital (Hosp)                            | -        |                                                 |
|                                    | Radiologist (Rad)                          | 26%      | 2020 - American Medical Association             |
|                                    | Emergency Medicine (EM)                    | 28%      | 2020 - American Medical Association             |
|                                    | Urgent Care (UC)                           | -        |                                                 |
