# Supplementary material for: Impact of patient gender on low back pain management before and after the COVID-19 pandemic in commercially insured and Medicare Advantage cohorts. A retrospective cohort study
Source: bioRxiv or medRxiv preprint supplement (doi:10.1101/2023.06.05.23290968), 2023-06-05
Supplement: Supplementary file [file media-3.pdf]

**Supplement - State Public Policy Responses to COVID-19**

| State | Oxford Stringency on April 1 (low = more restrictive) <sup>1</sup> |       |      |      |          |      |                                            | Raifman (low rank = more restrictive) <sup>2</sup> |          |      |       |                                |                          |                                                     |                                                |                                  |                                      |     |     |     |     |             |
|-------|--------------------------------------------------------------------|-------|------|------|----------|------|--------------------------------------------|----------------------------------------------------|----------|------|-------|--------------------------------|--------------------------|-----------------------------------------------------|------------------------------------------------|----------------------------------|--------------------------------------|-----|-----|-----|-----|-------------|
|       | Score                                                              |       | Rank |      | Category |      |                                            | Overall Rank                                       |          |      | Rank  |                                |                          |                                                     |                                                |                                  | Days Policy In Place                 |     |     |     |     |             |
|       | 2020                                                               | 2021  | 2020 | 2021 | 2020     | 2021 | Combination<br>T25=top 25<br>B25=bottom 25 | Rank                                               | Category | Rank | Total | State of<br>Emergency<br>(SOE) | Stay at<br>home<br>(SAH) | Cease<br>elective<br>medical<br>procedures<br>(EMP) | Close non-<br>essential<br>businesses<br>(NEB) | Mask<br>mandate<br>(MM) -<br>SOE | MM -<br>public<br>businesses<br>(PB) | SOE | SAH | EMP | NEB | MM -<br>SOE |
| DC    | 87.04                                                              | 61.11 | 3    | 4    | T25      | T25  | Top 25                                     | Most Restrictive                                   | 10       | 83   | 13    | 16                             | 33                       | 5                                                   | 8                                              | 8                                | 731                                  | 58  | 0   | 64  | 611 | 575         |
| VT    | 82.41                                                              | 65.74 | 8    | 2    | T25      | T25  | Top 25                                     | Restrictive                                        | 22       | 140  | 44    | 23                             | 9                        | 38                                                  | 15                                             | 11                               | 453                                  | 51  | 44  | 32  | 451 | 417         |
| KY    | 85.19                                                              | 58.33 | 5    | 8    | T25      | T25  | Top 25                                     | Most Restrictive                                   | 6        | 63   | 4     | 4                              | 6                        | 20                                                  | 12                                             | 17                               | 736                                  | 93  | 48  | 45  | 455 | 390         |
| RI    | 82.41                                                              | 59.26 | 8    | 7    | T25      | T25  | Top 25                                     | Restrictive                                        | 16       | 119  | 8     | 30                             | 33                       | 30                                                  | 9                                              | 9                                | 733                                  | 41  | 0   | 39  | 477 | 438         |
| NY    | 82.41                                                              | 58.33 | 8    | 8    | T25      | T25  | Top 25                                     | Most Restrictive                                   | 2        | 48   | 35    | 3                              | 1                        | 1                                                   | 6                                              | 2                                | 468                                  | 95  | 78  | 76  | 692 | 652         |
| CA    | 82.41                                                              | 56.94 | 8    | 13   | T25      | T25  | Top 25                                     | Most Restrictive                                   | 3        | 52   | 2     | 1                              | 24                       | 16                                                  | 4                                              | 5                                | 738                                  | 306 | 33  | 49  | 701 | 640         |
| CO    | 82.41                                                              | 56.02 | 8    | 14   | T25      | T25  | Top 25                                     | Restrictive                                        | 27       | 156  | 31    | 35                             | 23                       | 24                                                  | 22                                             | 21                               | 477                                  | 31  | 34  | 42  | 424 | 382         |
| OH    | 82.41                                                              | 54.63 | 8    | 18   | T25      | T25  | Top 25                                     | Restrictive                                        | 18       | 130  | 41    | 18                             | 11                       | 28                                                  | 16                                             | 16                               | 459                                  | 56  | 43  | 40  | 443 | 393         |
| MN    | 82.41                                                              | 54.63 | 8    | 18   | T25      | T25  | Top 25                                     | Restrictive                                        | 30       | 167  | 35    | 24                             | 7                        | 42                                                  | 25                                             | 34                               | 468                                  | 50  | 47  | 29  | 421 | 289         |
| AK    | 85.19                                                              | 53.24 | 5    | 21   | T25      | T25  | Top 25                                     | Least Restrictive                                  | 48       | 246  | 49    | 42                             | 26                       | 41                                                  | 44                                             | 44                               | 409                                  | 26  | 31  | 30  | 71  | 28          |
| NM    | 87.04                                                              | 52.31 | 3    | 24   | T25      | T25  | Top 25                                     | Most Restrictive                                   | 4        | 60   | 13    | 2                              | 24                       | 12                                                  | 5                                              | 4                                | 731                                  | 246 | 33  | 52  | 696 | 641         |
| WA    | 79.63                                                              | 57.41 | 20   | 12   | T25      | T25  | Top 25                                     | Most Restrictive                                   | 1        | 25   | 1     | 8                              | 4                        | 4                                                   | 2                                              | 6                                | 742                                  | 68  | 59  | 66  | 732 | 634         |
| ME    | 81.48                                                              | 55.56 | 17   | 16   | T25      | T25  | Top 25                                     | Restrictive                                        | 28       | 160  | 40    | 14                             | 33                       | 34                                                  | 20                                             | 19                               | 465                                  | 59  | 0   | 36  | 429 | 383         |
| KS    | 79.63                                                              | 52.78 | 20   | 23   | T25      | T25  | Top 25                                     | Least Restrictive                                  | 38       | 216  | 44    | 34                             | 33                       | 36                                                  | 33                                             | 36                               | 453                                  | 34  | 0   | 34  | 379 | 261         |
| OR    | 78.7                                                               | 61.11 | 26   | 4    | B25      | T25  | Mixed                                      | Most Restrictive                                   | 5        | 62   | 7     | 5                              | 16                       | 12                                                  | 10                                             | 12                               | 734                                  | 86  | 38  | 52  | 472 | 411         |
| HI    | 76.85                                                              | 71.3  | 29   | 1    | B25      | T25  | Mixed                                      | Most Restrictive                                   | 8        | 75   | 2     | 12                             | 33                       | 24                                                  | 1                                              | 3                                | 738                                  | 66  | 0   | 42  | 742 | 645         |
| IL    | 82.41                                                              | 51.85 | 8    | 26   | T25      | B25  | Mixed                                      | Most Restrictive                                   | 9        | 80   | 8     | 8                              | 33                       | 3                                                   | 14                                             | 14                               | 733                                  | 68  | 0   | 68  | 452 | 400         |
| MD    | 87.96                                                              | 50.46 | 1    | 33   | T25      | B25  | Mixed                                      | Restrictive                                        | 16       | 119  | 32    | 27                             | 11                       | 12                                                  | 19                                             | 18                               | 476                                  | 45  | 43  | 52  | 430 | 387         |
| ID    | 87.96                                                              | 50    | 1    | 34   | T25      | B25  | Mixed                                      | Least Restrictive                                  | 39       | 212  | 20    | 33                             | 33                       | 34                                                  | 46                                             | 46                               | 729                                  | 36  | 0   | 36  | 0   | 0           |
| MA    | 75.93                                                              | 62.04 | 33   | 3    | B25      | T25  | Mixed                                      | Restrictive                                        | 14       | 110  | 42    | 19                             | 3                        | 10                                                  | 17                                             | 19                               | 455                                  | 54  | 60  | 54  | 439 | 383         |
| NV    | 76.85                                                              | 58.33 | 29   | 8    | B25      | T25  | Mixed                                      | Restrictive                                        | 15       | 114  | 17    | 32                             | 33                       | 18                                                  | 7                                              | 7                                | 730                                  | 39  | 0   | 48  | 688 | 631         |
| LA    | 75.93                                                              | 59.72 | 33   | 6    | B25      | T25  | Mixed                                      | Restrictive                                        | 19       | 133  | 13    | 21                             | 16                       | 31                                                  | 28                                             | 24                               | 731                                  | 52  | 38  | 38  | 407 | 357         |
| WV    | 82.41                                                              | 50.93 | 8    | 32   | T25      | B25  | Mixed                                      | Restrictive                                        | 23       | 145  | 29    | 30                             | 30                       | 28                                                  | 13                                             | 15                               | 726                                  | 41  | 26  | 40  | 454 | 399         |
| WI    | 76.85                                                              | 56.02 | 29   | 14   | B25      | T25  | Mixed                                      | Restrictive                                        | 29       | 166  | 17    | 25                             | 33                       | 19                                                  | 33                                             | 39                               | 730                                  | 48  | 0   | 46  | 379 | 240         |
| NC    | 80.56                                                              | 51.85 | 19   | 26   | T25      | B25  | Mixed                                      | Restrictive                                        | 25       | 149  | 11    | 21                             | 33                       | 31                                                  | 22                                             | 31                               | 732                                  | 52  | 0   | 38  | 424 | 318         |
| MI    | 75.46                                                              | 58.33 | 37   | 8    | B25      | T25  | Mixed                                      | Restrictive                                        | 26       | 153  | 51    | 10                             | 2                        | 7                                                   | 42                                             | 41                               | 202                                  | 67  | 68  | 62  | 202 | 155         |
| CT    | 78.7                                                               | 53.7  | 26   | 20   | B25      | T25  | Mixed                                      | Most Restrictive                                   | 7        | 73   | 11    | 17                             | 33                       | 8                                                   | 3                                              | 1                                | 732                                  | 57  | 0   | 57  | 730 | 707         |
| IN    | 79.63                                                              | 51.85 | 20   | 26   | T25      | B25  | Mixed                                      | Restrictive                                        | 13       | 107  | 4     | 20                             | 13                       | 11                                                  | 31                                             | 28                               | 736                                  | 53  | 41  | 53  | 390 | 335         |
| DE    | 81.48                                                              | 49.07 | 17   | 35   | T25      | B25  | Mixed                                      | Restrictive                                        | 20       | 138  | 30    | 10                             | 33                       | 22                                                  | 21                                             | 22                               | 479                                  | 67  | 0   | 44  | 428 | 380         |
| FL    | 77.31                                                              | 52.31 | 28   | 24   | B25      | T25  | Mixed                                      | Restrictive                                        | 24       | 146  | 38    | 27                             | 9                        | 20                                                  | 27                                             | 25                               | 467                                  | 45  | 44  | 45  | 415 | 353         |
| NH    | 85.19                                                              | 41.67 | 5    | 49   | T25      | B25  | Mixed                                      | Restrictive                                        | 21       | 139  | 20    | 6                              | 33                       | 23                                                  | 30                                             | 27                               | 729                                  | 78  | 0   | 43  | 393 | 345         |
| TN    | 75.93                                                              | 53.24 | 33   | 21   | B25      | T25  | Mixed                                      | Least Restrictive                                  | 40       | 215  | 17    | 40                             | 19                       | 47                                                  | 46                                             | 46                               | 730                                  | 27  | 37  | 26  | 0   | 0           |
| MT    | 79.63                                                              | 48.61 | 20   | 36   | T25      | B25  | Mixed                                      | Least Restrictive                                  | 42       | 226  | 35    | 37                             | 33                       | 42                                                  | 39                                             | 40                               | 468                                  | 28  | 0   | 29  | 330 | 207         |
| WY    | 69.44                                                              | 55.56 | 41   | 16   | B25      | T25  | Mixed                                      | Least Restrictive                                  | 34       | 192  | 20    | 45                             | 33                       | 24                                                  | 37                                             | 33                               | 729                                  | 0   | 0   | 42  | 363 | 315         |
| OK    | 79.63                                                              | 46.3  | 20   | 40   | T25      | B25  | Mixed                                      | Least Restrictive                                  | 46       | 239  | 49    | 29                             | 20                       | 49                                                  | 46                                             | 46                               | 409                                  | 44  | 36  | 23  | 0   | 0           |
| PA    | 79.63                                                              | 43.52 | 20   | 44   | T25      | B25  | Mixed                                      | Most Restrictive                                   | 12       | 98   | 43    | 13                             | 20                       | 2                                                   | 10                                             | 10                               | 454                                  | 64  | 36  | 74  | 472 | 429         |
| VA    | 75.93                                                              | 51.85 | 33   | 26   | B25      | B25  | Bottom 25                                  | Restrictive                                        | 17       | 123  | 34    | 14                             | 20                       | 5                                                   | 24                                             | 26                               | 469                                  | 59  | 36  | 64  | 423 | 346         |
| NJ    | 76.85                                                              | 47.22 | 29   | 38   | B25      | B25  | Bottom 25                                  | Most Restrictive                                   | 11       | 94   | 46    | 6                              | 4                        | 8                                                   | 17                                             | 13                               | 445                                  | 78  | 59  | 57  | 439 | 410         |
| MO    | 67.59                                                              | 51.39 | 43   | 31   | B25      | B25  | Bottom 25                                  | Least Restrictive                                  | 43       | 222  | 20    | 37                             | 33                       | 40                                                  | 46                                             | 46                               | 729                                  | 28  | 0   | 31  | 0   | 0           |
| TX    | 75                                                                 | 47.69 | 38   | 37   | B25      | B25  | Bottom 25                                  | Least Restrictive                                  | 32       | 182  | 20    | 36                             | 8                        | 42                                                  | 38                                             | 38                               | 729                                  | 29  | 46  | 29  | 357 | 247         |
| GA    | 54.63                                                              | 51.85 | 49   | 26   | B25      | B25  | Bottom 25                                  | Least Restrictive                                  | 37       | 204  | 38    | 37                             | 33                       | 45                                                  | 28                                             | 23                               | 467                                  | 28  | 0   | 28  | 407 | 367         |
| SC    | 74.07                                                              | 47.22 | 39   | 38   | B25      | B25  | Bottom 25                                  | Least Restrictive                                  | 44       | 231  | 47    | 40                             | 33                       | 50                                                  | 26                                             | 35                               | 444                                  | 27  | 0   | 19  | 418 | 278         |
| AL    | 73.61                                                              | 43.52 | 40   | 44   | B25      | B25  | Bottom 25                                  | Least Restrictive                                  | 33       | 187  | 33    | 42                             | 13                       | 38                                                  | 32                                             | 29                               | 473                                  | 26  | 41  | 32  | 386 | 328         |
| UT    | 69.44                                                              | 43.98 | 41   | 43   | B25      | B25  | Bottom 25                                  | Least Restrictive                                  | 37       | 204  | 4     | 45                             | 29                       | 36                                                  | 45                                             | 45                               | 736                                  | 0   | 27  | 34  | 55  | 21          |
| AR    | 65.74                                                              | 44.44 | 45   | 42   | B25      | B25  | Bottom 25                                  | Least Restrictive                                  | 45       | 232  | 48    | 45                             | 31                       | 45                                                  | 33                                             | 30                               | 439                                  | 0   | 24  | 28  | 379 | 319         |
| AZ    | 62.04                                                              | 45.83 | 47   | 41   | B25      | B25  | Bottom 25                                  | Restrictive                                        | 26       | 153  | 13    | 26                             | 15                       | 31                                                  | 36                                             | 32                               | 731                                  | 46  | 40  | 38  | 374 | 317         |
| NE    | 66.2                                                               | 43.52 | 44   | 44   | B25      | B25  | Bottom 25                                  | Least Restrictive                                  | 35       | 195  | 20    | 45                             | 26                       | 12                                                  | 46                                             | 46                               | 729                                  | 0   | 31  | 52  | 0   | 0           |
| IA    | 62.04                                                              | 43.52 | 47   | 44   | B25      | B25  | Bottom 25                                  | Least Restrictive                                  | 31       | 180  | 8     | 45                             | 28                       | 16                                                  | 40                                             | 43                               | 733                                  | 0   | 30  | 49  | 328 | 80          |
| SD    | 65.74                                                              | 41.67 | 45   | 49   | B25      | B25  | Bottom 25                                  | Least Restrictive                                  | 47       | 240  | 20    | 45                             | 32                       | 51                                                  | 46                                             | 46                               | 729                                  | 0   | 22  | 0   | 0   | 0           |
| MS    | 50.93                                                              | 43.52 | 51   | 44   | B25      | B25  | Bottom 25                                  | Least Restrictive                                  | 41       | 221  | 28    | 44                             | 16                       | 48                                                  | 43                                             | 42                               | 728                                  | 24  | 38  | 24  | 196 | 143         |
| ND    | 51.85                                                              | 39.81 | 50   | 51   | B25      | B25  | Bottom 25                                  | Least Restrictive                                  | 36       | 203  | 20    | 45                             | 33                       | 27                                                  | 41                                             | 37                               | 729                                  | 0   | 0   | 41  | 305 | 260         |

1. Thomas Hale, Noam Angrist, Rafael Goldszmidt, Beatriz Kira, Anna Petherick, Toby Phillips, Samuel Webster, Emily Cameron-Blake, Laura Hallas, Saptarshi Majumdar, and Helen Tatlow. (2021). "A global panel database of pandemic policies (Oxford COVID-19 Government Response Tracker)." Nature Human Behaviour. <https://doi.org/10.1038/s41562-021-01079-8> (accessed 3/15/2023)

2. Raifman J, Nocka K, Jones D, Bor J, Lipson S, Jay J, and Chan P. (2020). "COVID-19 US state policy database." Available at: [www.tinyurl.com/statepolicies](http://www.tinyurl.com/statepolicies) (accessed 3/20/2022)
