# Supplementary material for: Impact of patient gender on low back pain management before and after the COVID-19 pandemic in commercially insured and Medicare Advantage cohorts. A retrospective cohort study
Source: bioRxiv or medRxiv preprint supplement (doi:10.1101/2023.06.05.23290968), 2023-06-05
Supplement: Supplementary file [file media-6.pdf]

Supplement - Table 1 - Cohort, population and episode attributes for complete low back pain episodes <91 days duration by type of healthcare provider (HCP) initially contacted

|                                                                       | Commercial           |                      |                      |                      |                      |                      |
|-----------------------------------------------------------------------|----------------------|----------------------|----------------------|----------------------|----------------------|----------------------|
|                                                                       | Female               |                      |                      | Male                 |                      |                      |
|                                                                       | Pre-COVID            | Early COVID          | Late COVID           | Pre-COVID            | Early COVID          | Late COVID           |
| <b>Commercial</b>                                                     |                      |                      |                      |                      |                      |                      |
| <b>Type of HCP initially contacted - Doctor of Chiropractic (DC)</b>  |                      |                      |                      |                      |                      |                      |
| Episodes                                                              | 8682                 | 10118                | 9338                 | 9185                 | 10761                | 10158                |
| Individuals                                                           | 8356                 | 9751                 | 9214                 | 8862                 | 10393                | 9970                 |
| # Unique HCPs                                                         | 5914                 | 6620                 | 6352                 | 6204                 | 6885                 | 6731                 |
| Total Cost                                                            | \$3,291,636          | \$3,504,309          | \$3,296,250          | \$3,635,743          | \$3,973,736          | \$3,768,840          |
| Individual Attributes - % of Median (Q1, Q3)                          |                      |                      |                      |                      |                      |                      |
| % Female                                                              | 100%                 | 100%                 | 100%                 | 0%                   | 0%                   | 0%                   |
| Age                                                                   | 40 (30, 51)          | 39 (29, 51)          | 40 (30, 52)          | 41 (31, 51)          | 40 (30, 51)          | 41 (31, 52)          |
| ERG® Risk Score                                                       | 0.9 (0.5, 1.8)       | 0.9 (0.5, 1.9)       | 1.0 (0.5, 2.1)       | 0.6 (0.3, 1.4)       | 0.6 (0.3, 1.3)       | 0.7 (0.3, 1.5)       |
| Individual Home Address 5-digit Zip Code Attributes - Median (Q1, Q3) |                      |                      |                      |                      |                      |                      |
| % Non-Hispanic White (NHW)                                            | 70.4% (53.7%, 82.4%) | 71.4% (53.9%, 83.0%) | 71.0% (53.5%, 83.0%) | 71.0% (53.9%, 82.9%) | 71.4% (54.0%, 83.7%) | 71.0% (53.5%, 83.0%) |
| Area Deprivation Index (ADI)                                          | 42 (24, 60)          | 44 (26, 62)          | 44 (26, 62)          | 44 (25, 62)          | 46 (27, 63)          | 44 (25, 63)          |
| Household Adjusted Gross Income (AGI) - 1000s                         | 76 (58, 109)         | 74 (57, 104)         | 74 (57, 104)         | 75 (57, 107)         | 72 (56, 102)         | 74 (57, 105)         |
| Total Episode Attributes - Median (Q1, Q3)                            |                      |                      |                      |                      |                      |                      |
| Cost                                                                  | \$180 (84, 385)      | \$176 (80, 371)      | \$180 (80, 385)      | \$167 (74, 363)      | \$161 (72, 353)      | \$165 (71, 360)      |
| # Healthcare Providers Seen                                           | 1 (1, 1)             | 1 (1, 1)             | 1 (1, 1)             | 1 (1, 1)             | 1 (1, 1)             | 1 (1, 1)             |
| Duration (days)                                                       | 17 (2, 44)           | 17 (3, 47)           | 18 (3, 45)           | 14 (1, 40)           | 13 (1, 41)           | 14 (1, 42)           |
| <b>Type of HCP initially contacted - Primary Care Physician (PCP)</b> |                      |                      |                      |                      |                      |                      |
| Episodes                                                              | 7071                 | 8992                 | 7860                 | 6626                 | 8207                 | 7304                 |
| Individuals                                                           | 6964                 | 8871                 | 7851                 | 6524                 | 8103                 | 7290                 |
| # Unique HCPs                                                         | 6208                 | 7915                 | 6977                 | 5826                 | 7120                 | 6383                 |
| Total Cost                                                            | \$3,147,397          | \$4,027,695          | \$3,575,960          | \$3,731,185          | \$4,669,495          | \$4,337,049          |
| Individual Attributes - % of Median (Q1, Q3)                          |                      |                      |                      |                      |                      |                      |
| % Female                                                              | 100%                 | 100%                 | 100%                 | 0%                   | 0%                   | 0%                   |
| Age                                                                   | 48 (37, 56)          | 48 (37, 57)          | 49 (37, 58)          | 49 (38, 57)          | 49 (39, 58)          | 50 (40, 58)          |
| ERG® Risk Score                                                       | 1.3 (0.7, 2.7)       | 1.4 (0.7, 2.9)       | 1.6 (0.8, 3.0)       | 1.0 (0.5, 2.0)       | 1.1 (0.5, 2.3)       | 1.2 (0.6, 2.4)       |
| Individual Home Address 5-digit Zip Code Attributes - Median (Q1, Q3) |                      |                      |                      |                      |                      |                      |
| % Non-Hispanic White (NHW)                                            | 60.3% (39.1%, 76.6%) | 61.2% (38.2%, 76.6%) | 60.4% (38.5%, 76.2%) | 62.4% (41.9%, 77.3%) | 63.1% (43.1%, 78.4%) | 62.7% (41.8%, 78.2%) |
| Area Deprivation Index (ADI)                                          | 39 (21, 59)          | 40 (22, 60)          | 41 (21, 60)          | 40 (21, 59)          | 41 (22, 60)          | 40 (21, 61)          |
| Household Adjusted Gross Income (AGI) - 1000s                         | 70 (53, 102)         | 69 (52, 98)          | 70 (52, 99)          | 71 (54, 102)         | 70 (53, 102)         | 70 (53, 102)         |
| Total Episode Attributes - Median (Q1, Q3)                            |                      |                      |                      |                      |                      |                      |
| Cost                                                                  | \$118 (19, 318)      | \$85 (15, 265)       | \$98 (16, 311)       | \$141 (30, 363)      | \$117 (23, 310)      | \$122 (20, 362)      |
| # Healthcare Providers Seen                                           | 1 (1, 2)             | 1 (1, 2)             | 1 (1, 2)             | 1 (1, 2)             | 1 (1, 2)             | 1 (1, 2)             |
| Duration (days)                                                       | 6 (1, 43)            | 4 (1, 40)            | 4 (1, 43)            | 7 (1, 39)            | 4 (1, 39)            | 6 (1, 42)            |
| <b>Type of HCP initially contacted - Orthopedic Surgeon (OS)</b>      |                      |                      |                      |                      |                      |                      |
| Episodes                                                              | 2987                 | 3346                 | 3509                 | 2744                 | 3302                 | 3299                 |
| Individuals                                                           | 2953                 | 3316                 | 3508                 | 2722                 | 3283                 | 3297                 |
| # Unique HCPs                                                         | 2033                 | 2266                 | 2342                 | 1913                 | 2251                 | 2270                 |
| Total Cost                                                            | \$3,378,164          | \$2,842,037          | \$2,997,549          | \$3,037,761          | \$3,525,228          | \$3,646,879          |
| Individual Attributes - % of Median (Q1, Q3)                          |                      |                      |                      |                      |                      |                      |
| % Female                                                              | 100%                 | 100%                 | 100%                 | 0%                   | 0%                   | 0%                   |
| Age                                                                   | 46 (27, 56)          | 47 (28, 57)          | 48 (31, 58)          | 47 (29, 57)          | 46 (30, 57)          | 48 (32, 58)          |
| ERG® Risk Score                                                       | 1.4 (0.7, 2.7)       | 1.5 (0.7, 2.9)       | 1.6 (0.8, 3.1)       | 1.2 (0.5, 2.5)       | 1.2 (0.5, 2.6)       | 1.4 (0.6, 2.8)       |
| Individual Home Address 5-digit Zip Code Attributes - Median (Q1, Q3) |                      |                      |                      |                      |                      |                      |
| % Non-Hispanic White (NHW)                                            | 64.7% (48.2%, 77.2%) | 64.1% (45.8%, 76.6%) | 65.0% (47.5%, 76.2%) | 65.1% (49.4%, 77.3%) | 64.6% (47.9%, 76.9%) | 65.1% (48.8%, 77.3%) |
| Area Deprivation Index (ADI)                                          | 26 (12, 46)          | 27 (14, 47)          | 27 (14, 50)          | 26 (13, 46)          | 27 (14, 48)          | 27 (13, 48)          |
| Household Adjusted Gross Income (AGI) - 1000s                         | 94 (65, 145)         | 89 (64, 141)         | 89 (62, 139)         | 95 (66, 149)         | 92 (64, 141)         | 92 (64, 143)         |
| Total Episode Attributes - Median (Q1, Q3)                            |                      |                      |                      |                      |                      |                      |
| Cost                                                                  | \$289 (151, 750)     | \$298 (148, 760)     | \$321 (160, 757)     | \$297 (157, 783)     | \$327 (160, 828)     | \$342 (165, 936)     |
| # Healthcare Providers Seen                                           | 1 (1, 2)             | 1 (1, 2)             | 1 (1, 2)             | 1 (1, 2)             | 1 (1, 2)             | 1 (1, 2)             |
| Duration (days)                                                       | 8 (1, 40)            | 10 (1, 43)           | 12 (1, 43)           | 11 (1, 38)           | 11 (1, 40)           | 14 (1, 44)           |
| <b>Medicare Advantage</b>                                             |                      |                      |                      |                      |                      |                      |
| <b>Type of HCP initially contacted - Doctor of Chiropractic (DC)</b>  |                      |                      |                      |                      |                      |                      |
| Episodes                                                              | 7059                 | 6767                 | 8292                 | 6506                 | 6393                 | 7480                 |
| Individuals                                                           | 6802                 | 6569                 | 8187                 | 6309                 | 6189                 | 7394                 |
| # Unique HCPs                                                         | 4754                 | 4638                 | 5716                 | 4476                 | 4392                 | 5168                 |
| Total Cost                                                            | \$1,574,291          | \$1,647,355          | \$2,093,569          | \$1,594,978          | \$1,543,041          | \$1,888,137          |
| Individual Attributes - % of Median (Q1, Q3)                          |                      |                      |                      |                      |                      |                      |
| % Female                                                              | 100%                 | 100%                 | 100%                 | 0%                   | 0%                   | 0%                   |
| Age                                                                   | 72 (68, 76)          | 72 (68, 77)          | 72 (68, 77)          | 72 (68, 77)          | 72 (68, 77)          | 72 (68, 77)          |
| ERG® Risk Score                                                       | 0.7 (0.3, 1.2)       | 0.7 (0.4, 1.2)       | 0.8 (0.4, 1.3)       | 0.7 (0.4, 1.3)       | 0.8 (0.4, 1.3)       | 0.8 (0.4, 1.4)       |
| Individual Home Address 5-digit Zip Code Attributes - Median (Q1, Q3) |                      |                      |                      |                      |                      |                      |
| % Non-Hispanic White (NHW)                                            | 77.6% (63.1%, 87.1%) | 78.5% (64.4%, 87.7%) | 78.1% (64.0%, 87.3%) | 78.6% (63.8%, 87.8%) | 79.7% (65.6%, 88.6%) | 79.3% (65.4%, 88.1%) |
| Area Deprivation Index (ADI)                                          | 53 (36, 69)          | 54 (38, 70)          | 54 (38, 70)          | 53 (36, 68)          | 54 (38, 70)          | 54 (38, 70)          |
| Household Adjusted Gross Income (AGI) - 1000s                         | 65 (53, 86)          | 64 (53, 83)          | 64 (53, 84)          | 66 (53, 86)          | 64 (53, 84)          | 64 (53, 84)          |
| Total Episode Attributes - Median (Q1, Q3)                            |                      |                      |                      |                      |                      |                      |
| Cost                                                                  | \$123 (58, 248)      | \$131 (58, 267)      | \$135 (61, 277)      | \$117 (56, 245)      | \$122 (57, 255)      | \$128 (59, 268)      |
| # Healthcare Providers Seen                                           | 1 (1, 1)             | 1 (1, 1)             | 1 (1, 1)             | 1 (1, 1)             | 1 (1, 1)             | 1 (1, 1)             |
| Duration (days)                                                       | 22 (5, 50)           | 22 (5, 50)           | 22 (6, 51)           | 19 (4, 46)           | 19 (4, 48)           | 20 (5, 48)           |
| <b>Type of HCP initially contacted - Primary Care Physician (PCP)</b> |                      |                      |                      |                      |                      |                      |
| Episodes                                                              | 27246                | 32374                | 30894                | 17255                | 20906                | 19987                |
| Individuals                                                           | 26677                | 31748                | 30844                | 16890                | 20525                | 19960                |
| # Unique HCPs                                                         | 19077                | 22114                | 21960                | 13083                | 15565                | 15416                |
| Total Cost                                                            | \$5,621,082          | \$6,176,616          | \$6,685,227          | \$3,793,046          | \$4,501,602          | \$5,054,857          |
| Individual Attributes - % of Median (Q1, Q3)                          |                      |                      |                      |                      |                      |                      |
| % Female                                                              | 100%                 | 100%                 | 100%                 | 0%                   | 0%                   | 0%                   |
| Age                                                                   | 72 (68, 79)          | 73 (68, 79)          | 73 (68, 79)          | 72 (67, 77)          | 72 (67, 78)          | 72 (67, 78)          |
| ERG® Risk Score                                                       | 0.9 (0.5, 1.6)       | 1.0 (0.5, 1.7)       | 1.1 (0.5, 1.8)       | 0.9 (0.4, 1.6)       | 1.0 (0.4, 1.7)       | 1.0 (0.5, 1.8)       |
| Individual Home Address 5-digit Zip Code Attributes - Median (Q1, Q3) |                      |                      |                      |                      |                      |                      |
| % Non-Hispanic White (NHW)                                            | 62.7% (39.4%, 79.1%) | 63.1% (39.8%, 79.2%) | 63.0% (40.0%, 79.0%) | 65.0% (42.6%, 80.5%) | 65.6% (43.2%, 80.7%) | 65.9% (43.5%, 80.6%) |
| Area Deprivation Index (ADI)                                          | 53 (32, 71)          | 53 (33, 71)          | 53 (33, 71)          | 52 (32, 70)          | 52 (32, 70)          | 52 (32, 70)          |
| Household Adjusted Gross Income (AGI) - 1000s                         | 60 (48, 80)          | 60 (48, 79)          | 60 (48, 79)          | 61 (48, 83)          | 61 (49, 82)          | 61 (49, 83)          |
| Total Episode Attributes - Median (Q1, Q3)                            |                      |                      |                      |                      |                      |                      |
| Cost                                                                  | \$43 (15, 149)       | \$41 (15, 126)       | \$46 (16, 163)       | \$45 (16, 156)       | \$44 (16, 132)       | \$46 (16, 171)       |
| # Healthcare Providers Seen                                           | 1 (1, 2)             | 1 (1, 1)             | 1 (1, 2)             | 1 (1, 2)             | 1 (1, 2)             | 1 (1, 2)             |
| Duration (days)                                                       | 10 (1, 51)           | 5 (1, 50)            | 12 (1, 53)           | 9 (1, 49)            | 6 (1, 50)            | 12 (1, 53)           |
| <b>Type of HCP initially contacted - Orthopedic Surgeon (OS)</b>      |                      |                      |                      |                      |                      |                      |
| Episodes                                                              | 5546                 | 5816                 | 7022                 | 3569                 | 3918                 | 4673                 |
| Individuals                                                           | 5502                 | 5777                 | 7017                 | 3549                 | 3900                 | 4672                 |
| # Unique HCPs                                                         | 3417                 | 3607                 | 4073                 | 2457                 | 2703                 | 3123                 |
| Total Cost                                                            | \$2,699,439          | \$3,296,508          | \$3,972,274          | \$2,276,110          | \$2,433,154          | \$2,920,096          |
| Individual Attributes - % of Median (Q1, Q3)                          |                      |                      |                      |                      |                      |                      |
| % Female                                                              | 100%                 | 100%                 | 100%                 | 0%                   | 0%                   | 0%                   |
| Age                                                                   | 72 (68, 78)          | 73 (68, 78)          | 73 (68, 78)          | 73 (68, 78)          | 73 (68, 78)          | 73 (69, 78)          |
| ERG® Risk Score                                                       | 1.0 (0.6, 1.7)       | 1.1 (0.6, 1.7)       | 1.1 (0.6, 1.8)       | 1.1 (0.6, 1.7)       | 1.1 (0.6, 1.8)       | 1.1 (0.6, 1.9)       |
| Individual Home Address 5-digit Zip Code Attributes - Median (Q1, Q3) |                      |                      |                      |                      |                      |                      |
| % Non-Hispanic White (NHW)                                            | 65.7% (45.4%, 79.4%) | 65.9% (46.1%, 79.5%) | 66.5% (47.2%, 79.8%) | 68.2% (49.6%, 80.8%) | 68.9% (50.0%, 80.7%) | 69.0% (51.3%, 81.0%) |
| Area Deprivation Index (ADI)                                          | 51 (32, 68)          | 53 (34, 69)          | 52 (34, 69)          | 49 (31, 66)          | 51 (32, 68)          | 50 (31, 67)          |
| Household Adjusted Gross Income (AGI) - 1000s                         | 64 (50, 89)          | 62 (49, 87)          | 63 (50, 88)          | 67 (52, 93)          | 65 (51, 91)          | 67 (52, 93)          |
| Total Episode Attributes - Median (Q1, Q3)                            |                      |                      |                      |                      |                      |                      |
| Cost                                                                  | \$200 (78, 515)      | \$197 (55, 521)      | \$237 (92, 609)      | \$224 (98, 582)      | \$229 (95, 585)      | \$252 (110, 637)     |
| # Healthcare Providers Seen                                           | 1 (1, 2)             | 1 (1, 2)             | 1 (1, 2)             | 1 (1, 2)             | 1 (1, 2)             | 1 (1, 2)             |
| Duration (days)                                                       | 18 (1, 49)           | 16 (1, 50)           | 21 (1, 51)           | 19 (1, 46)           | 21 (1, 49)           | 21 (1, 50)           |

Within CI and MA, compared to males for the same time period, cells in red indicate females are not significantly different - Mann-Whitney U test (p=0.05)
