# Supplementary material for: Impact of patient gender on low back pain management before and after the COVID-19 pandemic in commercially insured and Medicare Advantage cohorts. A retrospective cohort study
Source: bioRxiv or medRxiv preprint supplement (doi:10.1101/2023.06.05.23290968), 2023-06-05
Supplement: Supplementary file [file media-7.pdf]

**Supplement - Table 2 - Type of healthcare provider initially contacted by patient home address 5 digit zip code population measures of race/ethnicity and socioeconomic status**

|                                                                                                                                |       | % of Episodes Where Type of HCP Was Initially Contacted |       |             |       |            |       |                         |       |             |       |            |                   | Risk Ratio and 95% Confidence Interval Comparing Female to Male Baseline |                          |                          |                          |                          |                          |
|--------------------------------------------------------------------------------------------------------------------------------|-------|---------------------------------------------------------|-------|-------------|-------|------------|-------|-------------------------|-------|-------------|-------|------------|-------------------|--------------------------------------------------------------------------|--------------------------|--------------------------|--------------------------|--------------------------|--------------------------|
|                                                                                                                                |       | Commercial Insurance (CI)                               |       |             |       |            |       | Medicare Advantage (MA) |       |             |       |            |                   | Commercial Insurance (CI)                                                |                          |                          | Medicare Advantage (MA)  |                          |                          |
|                                                                                                                                |       | Pre-COVID                                               |       | Early COVID |       | Late COVID |       | Pre-COVID               |       | Early COVID |       | Late COVID |                   | Pre-COVID                                                                | Early COVID              | Late COVID               | Pre-COVID                | Early COVID              | Late COVID               |
|                                                                                                                                |       | F                                                       | M     | F           | M     | F          | M     | F                       | M     | F           | M     | F          | M                 | F                                                                        | M                        | F                        | M                        | F                        | M                        |
| <b>% of Population that is non-Hispanic white (NHW 0%-50%) and Area Deprivation Index (ADI 51-100) - Non-White, Low Income</b> |       |                                                         |       |             |       |            |       |                         |       |             |       |            |                   |                                                                          |                          |                          |                          |                          |                          |
| Episodes                                                                                                                       |       | 3453                                                    | 3208  | 4313        | 3972  | 4239       | 3739  | 14592                   | 8275  | 15752       | 8998  | 17272      | 9870              |                                                                          |                          |                          |                          |                          |                          |
| Non-Rx                                                                                                                         | DC    | 19.8%                                                   | 24.1% | 19.7%       | 23.6% | 18.8%      | 23.8% | 3.7%                    | 5.5%  | 3.4%        | 5.1%  | 3.8%       | 5.7%              | <b>0.82 (0.75, 0.90)</b>                                                 | <b>0.83 (0.77, 0.90)</b> | <b>0.79 (0.73, 0.86)</b> | <b>0.67 (0.60, 0.76)</b> | <b>0.68 (0.60, 0.76)</b> | <b>0.66 (0.59, 0.74)</b> |
|                                                                                                                                | PT    | 2.5%                                                    | 1.3%  | 1.7%        | 1.5%  | 2.1%       | 1.9%  | 2.4%                    | 2.4%  | 1.9%        | 1.8%  | 2.3%       | 2.1%              | 1.88 (1.30, 2.71)                                                        | 1.19 (0.85, 1.67)        | 1.11 (0.81, 1.51)        | 0.98 (0.83, 1.17)        | 1.07 (0.88, 1.30)        | 1.08 (0.92, 1.28)        |
|                                                                                                                                | LAc   | 0.1%                                                    | 0.1%  | 0.1%        | 0.1%  | 0.2%       | 0.1%  | 0.1%                    | 0.0%  | 0.0%        | 0.0%  | 0.1%       | 0.1%              | 0.93 (0.23, 3.71)                                                        | 2.30 (0.45, 11.86)       | 2.94 (0.81, 10.68)       | 9.07 (1.20, 68.41)       | 0.86 (0.24, 3.04)        | 1.83 (0.67, 4.99)        |
| Primary Care                                                                                                                   | PCP   | 25.0%                                                   | 24.1% | 27.8%       | 24.8% | 25.3%      | 24.6% | 35.9%                   | 35.5% | 39.9%       | 39.1% | 35.2%      | 34.0%             | 1.04 (0.95, 1.13)                                                        | 1.12 (1.04, 1.20)        | 1.03 (0.96, 1.11)        | 1.01 (0.98, 1.05)        | 1.02 (0.99, 1.05)        | 1.04 (1.00, 1.07)        |
|                                                                                                                                | Nurse | 7.7%                                                    | 7.5%  | 8.9%        | 7.4%  | 7.9%       | 7.2%  | 7.5%                    | 7.1%  | 8.1%        | 6.8%  | 7.7%       | 7.3%              | 1.02 (0.86, 1.21)                                                        | 1.21 (1.05, 1.40)        | 1.10 (0.94, 1.28)        | 1.05 (0.96, 1.16)        | 1.19 (1.08, 1.30)        | 1.05 (0.96, 1.15)        |
|                                                                                                                                | PA    | 6.0%                                                    | 6.7%  | 5.1%        | 6.1%  | 5.1%       | 5.2%  | 5.0%                    | 5.2%  | 4.6%        | 4.9%  | 5.1%       | 4.9%              | 0.89 (0.74, 1.07)                                                        | 0.83 (0.70, 1.00)        | 0.98 (0.81, 1.18)        | 0.96 (0.85, 1.07)        | 0.94 (0.83, 1.05)        | 1.03 (0.92, 1.15)        |
|                                                                                                                                | DO    | 0.2%                                                    | 0.2%  | 0.3%        | 0.3%  | 0.2%       | 0.3%  | 0.2%                    | 0.1%  | 0.1%        | 0.1%  | 0.1%       | 0.1%              | 1.08 (0.36, 3.22)                                                        | 1.01 (0.43, 2.38)        | 0.47 (0.19, 1.19)        | 1.42 (0.68, 2.95)        | 1.03 (0.47, 2.23)        | 1.01 (0.51, 1.99)        |
| Physician Specialist                                                                                                           | OS    | 6.7%                                                    | 6.0%  | 6.3%        | 7.0%  | 7.0%       | 6.4%  | 6.4%                    | 6.1%  | 6.4%        | 6.3%  | 6.8%       | 6.3%              | 1.13 (0.94, 1.36)                                                        | 0.91 (0.77, 1.07)        | 1.09 (0.93, 1.29)        | 1.05 (0.94, 1.16)        | 1.01 (0.92, 1.12)        | 1.06 (0.97, 1.17)        |
|                                                                                                                                | PMR   | 2.3%                                                    | 1.4%  | 1.9%        | 1.5%  | 1.7%       | 2.0%  | 1.9%                    | 1.8%  | 1.5%        | 1.6%  | 1.7%       | 1.4%              | 1.69 (1.17, 2.43)                                                        | 1.26 (0.91, 1.76)        | 0.85 (0.61, 1.17)        | 1.03 (0.85, 1.25)        | 0.97 (0.79, 1.20)        | 1.18 (0.97, 1.44)        |
|                                                                                                                                | PM    | 1.9%                                                    | 1.1%  | 1.5%        | 1.5%  | 1.6%       | 1.4%  | 3.0%                    | 3.2%  | 3.1%        | 3.0%  | 3.0%       | 3.0%              | 1.75 (1.16, 2.64)                                                        | 1.00 (0.71, 1.41)        | 1.18 (0.82, 1.69)        | 0.93 (0.80, 1.08)        | 1.01 (0.88, 1.17)        | 1.01 (0.88, 1.16)        |
|                                                                                                                                | Neuro | 0.5%                                                    | 0.1%  | 0.4%        | 0.3%  | 0.3%       | 0.3%  | 0.5%                    | 0.4%  | 0.6%        | 0.5%  | 0.5%       | 0.4%              | 4.18 (1.42, 12.34)                                                       | 1.47 (0.67, 3.24)        | 1.12 (0.51, 2.47)        | 1.26 (0.85, 1.88)        | 1.18 (0.82, 1.71)        | 1.10 (0.76, 1.59)        |
|                                                                                                                                | Rheum | 0.5%                                                    | 0.2%  | 0.8%        | 0.3%  | 0.5%       | 0.1%  | 1.1%                    | 0.5%  | 1.1%        | 0.4%  | 0.9%       | 0.3%              | 2.79 (1.11, 7.01)                                                        | 2.69 (1.40, 5.17)        | 5.07 (1.76, 14.65)       | 2.35 (1.67, 3.32)        | 2.73 (1.90, 3.92)        | 2.93 (2.01, 4.27)        |
|                                                                                                                                | NS    | 0.2%                                                    | 0.4%  | 0.3%        | 0.4%  | 0.3%       | 0.4%  | 0.3%                    | 0.5%  | 0.3%        | 0.3%  | 0.2%       | 0.3%              | 0.62 (0.25, 1.51)                                                        | 0.70 (0.34, 1.45)        | 0.71 (0.33, 1.51)        | 0.52 (0.34, 0.82)        | 0.94 (0.57, 1.54)        | 0.88 (0.55, 1.41)        |
| MD Oth                                                                                                                         | 1.4%  | 1.1%                                                    | 1.5%  | 1.4%        | 1.4%  | 1.1%       | 1.7%  | 2.2%                    | 2.3%  | 2.6%        | 1.8%  | 2.6%       | 1.30 (0.85, 2.00) | 1.13 (0.79, 1.61)                                                        | 1.27 (0.85, 1.89)        | 0.76 (0.63, 0.92)        | 0.90 (0.77, 1.06)        | 0.71 (0.60, 0.84)        |                          |
| Emergency Medicine/ Urgent Care                                                                                                | Hosp  | 11.4%                                                   | 12.3% | 10.5%       | 11.7% | 12.8%      | 12.0% | 16.2%                   | 15.2% | 13.9%       | 13.7% | 16.3%      | 16.2%             | 0.92 (0.81, 1.05)                                                        | 0.89 (0.79, 1.01)        | 1.06 (0.95, 1.19)        | 1.06 (1.00, 1.13)        | 1.01 (0.95, 1.08)        | 1.00 (0.95, 1.06)        |
|                                                                                                                                | Rad   | 9.2%                                                    | 8.4%  | 9.3%        | 7.1%  | 10.3%      | 8.3%  | 11.4%                   | 11.3% | 10.6%       | 11.0% | 12.1%      | 12.4%             | 1.09 (0.93, 1.27)                                                        | 1.31 (1.13, 1.52)        | 1.24 (1.08, 1.43)        | 1.01 (0.93, 1.09)        | 0.97 (0.90, 1.04)        | 0.97 (0.91, 1.04)        |
|                                                                                                                                | EM    | 3.6%                                                    | 3.9%  | 2.9%        | 4.0%  | 3.5%       | 3.9%  | 2.4%                    | 2.6%  | 1.9%        | 2.5%  | 2.1%       | 2.5%              | 0.91 (0.72, 1.17)                                                        | 0.74 (0.59, 0.93)        | 0.89 (0.71, 1.11)        | 0.93 (0.79, 1.10)        | 0.77 (0.65, 0.92)        | 0.82 (0.70, 0.96)        |
|                                                                                                                                | UC    | 1.1%                                                    | 1.1%  | 1.0%        | 1.2%  | 0.9%       | 1.0%  | 0.4%                    | 0.3%  | 0.3%        | 0.4%  | 0.4%       | 0.3%              | 0.95 (0.61, 1.51)                                                        | 0.81 (0.54, 1.21)        | 0.90 (0.58, 1.40)        | 1.47 (0.90, 2.40)        | 0.84 (0.55, 1.28)        | 1.51 (0.98, 2.33)        |
| <b>NHW 0-50 and ADI 0-50 - Non-White, High Income</b>                                                                          |       |                                                         |       |             |       |            |       |                         |       |             |       |            |                   |                                                                          |                          |                          |                          |                          |                          |
| Episodes                                                                                                                       |       | 6344                                                    | 5480  | 6970        | 6131  | 7189       | 6362  | 10708                   | 6432  | 10606       | 6706  | 11677      | 7371              |                                                                          |                          |                          |                          |                          |                          |
| Non-Rx                                                                                                                         | DC    | 17.6%                                                   | 20.6% | 17.9%       | 21.3% | 16.8%      | 20.5% | 3.8%                    | 6.2%  | 3.1%        | 4.7%  | 3.6%       | 5.1%              | <b>0.86 (0.79, 0.92)</b>                                                 | <b>0.84 (0.79, 0.91)</b> | <b>0.82 (0.77, 0.88)</b> | <b>0.61 (0.53, 0.70)</b> | <b>0.66 (0.57, 0.77)</b> | <b>0.70 (0.61, 0.80)</b> |
|                                                                                                                                | PT    | 5.0%                                                    | 3.9%  | 3.7%        | 3.3%  | 4.1%       | 3.0%  | 4.0%                    | 3.9%  | 2.6%        | 2.6%  | 3.7%       | 3.4%              | 1.29 (1.09, 1.53)                                                        | 1.13 (0.94, 1.35)        | 1.39 (1.16, 1.66)        | 1.02 (0.87, 1.18)        | 1.00 (0.83, 1.20)        | 1.08 (0.93, 1.26)        |
|                                                                                                                                | LAc   | 0.4%                                                    | 0.2%  | 0.4%        | 0.2%  | 0.5%       | 0.2%  | 0.2%                    | 0.3%  | 0.2%        | 0.1%  | 0.3%       | 0.3%              | 1.96 (0.97, 3.99)                                                        | 1.83 (0.94, 3.54)        | 3.14 (1.61, 6.12)        | 0.74 (0.42, 1.32)        | 1.26 (0.59, 2.70)        | 1.01 (0.61, 1.66)        |
| Primary Care                                                                                                                   | PCP   | 26.3%                                                   | 25.6% | 29.1%       | 26.4% | 25.2%      | 23.6% | 39.8%                   | 39.4% | 45.4%       | 45.6% | 38.7%      | 38.6%             | 1.03 (0.97, 1.09)                                                        | 1.10 (1.04, 1.17)        | 1.07 (1.00, 1.13)        | 1.01 (0.97, 1.05)        | 1.00 (0.96, 1.03)        | 1.00 (0.97, 1.04)        |
|                                                                                                                                | Nurse | 3.8%                                                    | 3.4%  | 3.2%        | 3.2%  | 3.4%       | 3.4%  | 3.8%                    | 3.6%  | 4.1%        | 3.6%  | 3.3%       | 3.3%              | 1.11 (0.92, 1.34)                                                        | 1.00 (0.83, 1.21)        | 0.99 (0.83, 1.19)        | 1.05 (0.90, 1.23)        | 1.14 (0.98, 1.33)        | 1.00 (0.86, 1.18)        |
|                                                                                                                                | PA    | 4.2%                                                    | 4.9%  | 3.7%        | 3.9%  | 3.4%       | 3.9%  | 3.4%                    | 3.8%  | 3.5%        | 3.3%  | 3.5%       | 3.6%              | 0.86 (0.73, 1.02)                                                        | 0.96 (0.81, 1.15)        | 0.86 (0.72, 1.02)        | 0.89 (0.76, 1.05)        | 1.06 (0.90, 1.25)        | 0.97 (0.83, 1.12)        |
|                                                                                                                                | DO    | 0.2%                                                    | 0.2%  | 0.2%        | 0.3%  | 0.2%       | 0.2%  | 0.2%                    | 0.1%  | 0.1%        | 0.1%  | 0.1%       | 0.1%              | 1.02 (0.46, 2.28)                                                        | 0.53 (0.26, 1.08)        | 1.25 (0.60, 2.62)        | 1.13 (0.51, 2.54)        | 1.37 (0.52, 3.60)        | 1.68 (0.66, 4.30)        |
| Physician Specialist                                                                                                           | OS    | 9.0%                                                    | 9.4%  | 10.2%       | 10.1% | 9.4%       | 10.1% | 6.5%                    | 6.2%  | 6.1%        | 6.1%  | 6.4%       | 6.8%              | 0.95 (0.85, 1.07)                                                        | 1.01 (0.92, 1.12)        | 0.93 (0.84, 1.03)        | 1.04 (0.92, 1.17)        | 1.00 (0.89, 1.13)        | 0.95 (0.85, 1.06)        |
|                                                                                                                                | PMR   | 3.8%                                                    | 5.0%  | 3.6%        | 3.6%  | 3.6%       | 3.9%  | 3.2%                    | 2.9%  | 2.7%        | 2.4%  | 2.9%       | 2.7%              | 0.76 (0.64, 0.90)                                                        | 0.98 (0.82, 1.17)        | 0.93 (0.79, 1.11)        | 1.11 (0.93, 1.32)        | 1.12 (0.93, 1.35)        | 1.06 (0.89, 1.26)        |
|                                                                                                                                | PM    | 2.4%                                                    | 1.5%  | 1.7%        | 2.4%  | 1.9%       | 1.6%  | 2.5%                    | 3.0%  | 2.4%        | 2.2%  | 2.3%       | 2.4%              | 1.55 (1.19, 2.02)                                                        | 0.72 (0.57, 0.91)        | 1.15 (0.89, 1.48)        | 0.82 (0.68, 0.99)        | 1.06 (0.87, 1.30)        | 0.93 (0.77, 1.12)        |
|                                                                                                                                | Neuro | 0.9%                                                    | 0.6%  | 0.9%        | 0.8%  | 0.8%       | 0.6%  | 0.9%                    | 0.8%  | 0.8%        | 1.0%  | 0.7%       | 0.8%              | 1.51 (0.98, 2.33)                                                        | 1.10 (0.75, 1.59)        | 1.38 (0.91, 2.09)        | 1.03 (0.74, 1.44)        | 0.80 (0.58, 1.10)        | 0.83 (0.59, 1.15)        |
|                                                                                                                                | Rheum | 0.9%                                                    | 0.4%  | 0.9%        | 0.4%  | 1.1%       | 0.2%  | 1.9%                    | 0.7%  | 1.8%        | 0.6%  | 1.3%       | 0.7%              | 2.32 (1.42, 3.77)                                                        | 2.42 (1.52, 3.85)        | 5.31 (2.95, 9.54)        | 2.60 (1.90, 3.56)        | 3.30 (2.32, 4.68)        | 1.94 (1.42, 2.66)        |
|                                                                                                                                | NS    | 0.3%                                                    | 0.3%  | 0.3%        | 0.2%  | 0.2%       | 0.4%  | 0.1%                    | 0.2%  | 0.2%        | 0.2%  | 0.1%       | 0.2%              | 1.12 (0.59, 2.10)                                                        | 1.39 (0.68, 2.87)        | 0.58 (0.31, 1.07)        | 0.53 (0.26, 1.08)        | 1.22 (0.62, 2.38)        | 0.63 (0.32, 1.24)        |
| MD Oth                                                                                                                         | 1.8%  | 1.7%                                                    | 2.1%  | 2.2%        | 1.5%  | 2.5%       | 2.4%  | 3.3%                    | 2.9%  | 3.4%        | 2.5%  | 3.6%       | 1.06 (0.81, 1.39) | 0.96 (0.76, 1.21)                                                        | 0.61 (0.48, 0.78)        | 0.74 (0.62, 0.88)        | 0.87 (0.73, 1.03)        | 0.71 (0.60, 0.83)        |                          |
| Emergency Medicine/ Urgent Care                                                                                                | Hosp  | 9.8%                                                    | 9.4%  | 8.3%        | 8.6%  | 10.8%      | 9.9%  | 11.4%                   | 11.3% | 10.0%       | 9.6%  | 13.5%      | 12.1%             | 1.04 (0.93, 1.16)                                                        | 0.96 (0.86, 1.08)        | 1.09 (0.99, 1.20)        | 1.01 (0.92, 1.10)        | 1.04 (0.95, 1.14)        | 1.12 (1.04, 1.21)        |
|                                                                                                                                | Rad   | 9.5%                                                    | 8.3%  | 10.1%       | 9.1%  | 13.2%      | 11.9% | 12.9%                   | 11.3% | 11.9%       | 12.0% | 14.5%      | 13.5%             | 1.14 (1.01, 1.28)                                                        | 1.11 (1.00, 1.23)        | 1.10 (1.01, 1.20)        | 1.13 (1.04, 1.23)        | 0.99 (0.91, 1.07)        | 1.07 (1.00, 1.15)        |
|                                                                                                                                | EM    | 2.9%                                                    | 3.2%  | 2.3%        | 2.7%  | 2.6%       | 3.1%  | 2.1%                    | 2.0%  | 1.4%        | 1.7%  | 1.6%       | 1.9%              | 0.90 (0.73, 1.10)                                                        | 0.83 (0.67, 1.03)        | 0.85 (0.70, 1.03)        | 1.05 (0.85, 1.30)        | 0.83 (0.65, 1.06)        | 0.86 (0.69, 1.07)        |
|                                                                                                                                | UC    | 1.1%                                                    | 1.3%  | 1.3%        | 1.2%  | 1.1%       | 0.9%  | 1.0%                    | 0.7%  | 0.9%        | 0.9%  | 0.8%       | 0.8%              | 0.86 (0.62, 1.20)                                                        | 1.05 (0.77, 1.42)        | 1.21 (0.87, 1.70)        | 1.42 (1.00, 2.02)        | 1.02 (0.74, 1.42)        | 0.94 (0.68, 1.30)        |
| <b>NHW 51-100 and ADI 51-100 - White, Low Income</b>                                                                           |       |                                                         |       |             |       |            |       |                         |       |             |       |            |                   |                                                                          |                          |                          |                          |                          |                          |
| Episodes                                                                                                                       |       | 8280                                                    | 8202  | 10278       | 10508 | 9850       | 9564  | 31659                   | 20912 | 35275       | 23747 | 39887      | 26521             |                                                                          |                          |                          |                          |                          |                          |
| Non-Rx                                                                                                                         | DC    | 32.6%                                                   | 36.3% | 32.7%       | 36.3% | 30.6%      | 34.8% | 10.5%                   | 14.8% | 9.3%        | 13.5% | 10.2%      | 14.0%             | <b>0.90 (0.86, 0.94)</b>                                                 | <b>0.90 (0.87, 0.94)</b> | <b>0.88 (0.84, 0.91)</b> | <b>0.71 (0.68, 0.74)</b> | <b>0.69 (0.66, 0.72)</b> | <b>0.72 (0.69, 0.75)</b> |
|                                                                                                                                | PT    | 1.9%                                                    | 1.8%  | 1.7%        | 1.3%  | 1.8%       | 1.6%  | 2.6%                    | 2.3%  | 2.1%        | 2.0%  | 2.7%       | 2.3%              | 1.04 (0.83, 1.29)                                                        | 1.23 (0.99, 1.54)        | 1.13 (0.92, 1.40)        | 1.16 (1.04, 1.29)        | 1.09 (0.97, 1.22)        | 1.16 (1.05, 1.28)        |
|                                                                                                                                | LAc   | 0.0%                                                    | 0.0%  | 0.0%        | 0.0%  | 0.0%       | 0.0%  | 0.0%                    | 0.0%  | 0.0%        | 0.0%  | 0.0%       | 0.0%              | 1.49 (0.25, 8.89)                                                        | 3.07 (0.32, 29.48)       | 1.46 (0.24, 8.71)        | 0.22 (0.02, 2.12)        | 0.22 (0.05, 1.11)        | 1.77 (0.47, 6.68)        |
| Primary Care                                                                                                                   | PCP   | 20.2%                                                   | 19.8% | 21.6%       | 20.3% | 18.9%      | 19.1% | 29.5%                   | 29.4% | 32.4%       | 31.7% | 26.9%      | 27.4%             | 1.02 (0.96, 1.08)                                                        | 1.07 (1.01, 1.12)        | 0.99 (0.93, 1.05)        | 1.01 (0.98, 1.03)        | 1.02 (1.00, 1.05)        | 0.98 (0.96, 1.01)        |
|                                                                                                                                | Nurse | 9.2%                                                    | 8.9%  | 9.8%        | 8.6%  | 10.0%      | 8.7%  | 8.0%                    | 7.1%  | 8.6%        | 7.8%  | 8.1%       | 6.9%              | 1.04 (0.94, 1.14)                                                        | 1.14 (1.05, 1.24)        | 1.15 (1.05, 1.26)        | 1.12 (1.05, 1.19)        | 1.11 (1.05, 1.17)        | 1.17 (1.11, 1.24)        |
|                                                                                                                                | PA    | 5.0%                                                    | 5.3%  | 4.5%        | 5.3%  | 4.9%       | 5.5%  | 4.2%                    | 4.3%  | 4.5%        | 4.4%  | 4.6%       | 4.7%              | 0.95 (0.83, 1.08)                                                        | 0.86 (0.76, 0.97)        | 0.89 (0.79, 1.00)        | 0.97 (0.90, 1.06)        | 1.04 (0.96, 1.12)        | 0.98 (0.91, 1.05)        |
|                                                                                                                                | DO    | 0.2%                                                    | 0.1%  | 0.1%        | 0.2%  | 0.2%       | 0.1%  | 0.1%                    | 0.1%  | 0.1%        | 0.1%  | 0.1%       | 0.2%              | 1.68 (0.77, 3.68)                                                        | 0.60 (0.30, 1.20)        | 1.62 (0.79, 3.31)        | 1.10 (0.64, 1.89)        | 0.87 (0.53, 1.42)        | 0.78 (0.51, 1.17)        |
| Physician Specialist                                                                                                           | OS    | 5.2%                                                    | 4.7%  | 4.6%        | 4.8%  | 5.8%       | 5.5%  | 6.0%                    | 5.9%  | 6.1%        | 6.1%  | 6.4%       | 6.3%              | 1.09 (0.96, 1.25)                                                        | 0.96 (0.85, 1.08)        | 1.05 (0.93, 1.18)        | 1.02 (0.95, 1.09)        | 1.00 (0.94, 1.07)        | 1.02 (0.96, 1.08)        |
|                                                                                                                                | PMR   | 1.3%                                                    | 1.2%  | 1.1%        | 1.3%  | 1.0%       | 1     |                         |       |             |       |            |                   |                                                                          |                          |                          |                          |                          |                          |
